# Supplementary material for: Burnout and distress among nurses in a cardiovascular centre of a quaternary hospital network: a cross-sectional survey
Source: PubMed Central journal article supplement — CMAJ Open. 2021 Jan 12;9(1):E19–28. doi: 10.9778/cmajo.20200058 (PMC7843080; doi:10.9778/cmajo.20200058), 2021-01-12
Supplement: supp_9.1.E19_2020-0058-1-at.pdf [file supp_9.1.E19_2020-0058-1-at.pdf]

**Appendix 1 (as supplied by the authors): Poster**

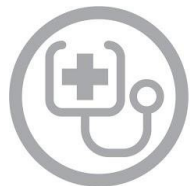

# Well-Being Index

## Why?

- ④ To assess the well-being of clinicians (nurses, allied health, pharmacists, physicians) at PMCC.

## What?

- ④ The Well-Being Index is a web-based tool that evaluates multiple dimensions of your well-being.
- ④ You will receive your own individual results. Your responses and your dashboard of results are **completely anonymous and confidential**.
- ④ PMCC will only receive aggregate anonymous data. This data will help us focus on caring for our caregivers.

## When?

- ④ On November 27, you will receive an email invitation from Canadian Viewpoint with the subject line “Invitation to use the Well-Being Index”.
- ④ The email invitation will have information and instructions that explain how to complete the Well-Being Index.

Thank you for participating in this important survey.
