# Supplementary material for: Burnout and distress among nurses in a cardiovascular centre of a quaternary hospital network: a cross-sectional survey
Source: PubMed Central journal article supplement — CMAJ Open. 2021 Jan 12;9(1):E19–28. doi: 10.9778/cmajo.20200058 (PMC7843080; doi:10.9778/cmajo.20200058), 2021-01-12
Supplement: supp_9.1.E19_2020-0058-4-at.pdf [file supp_9.1.E19_2020-0058-4-at.pdf]

**Appendix 4 (as supplied by the authors): Response to individual WBI survey questions**

|                                                         | Have you felt burned out from your work |           |         | Have you worried that work is hardening you emotionally |            |         | Have you often felt bothered by feeling down, depressed, or hopeless |            |         |
|---------------------------------------------------------|-----------------------------------------|-----------|---------|---------------------------------------------------------|------------|---------|----------------------------------------------------------------------|------------|---------|
|                                                         | Yes (N=188)                             | No (N=54) | P-value | Yes (N=179)                                             | No (N=63)  | P-value | Yes (N=135)                                                          | No (N=107) | P-value |
| <b>Gender, n (%)</b>                                    |                                         |           | 0.74    |                                                         |            | 0.74    |                                                                      |            | 0.46    |
| Male                                                    | 23 (74%)                                | 8 (26%)   |         | 24 (77%)                                                | 7 (22%)    |         | 15 (48%)                                                             | 16 (52%)   |         |
| Female                                                  | 162 (79%)                               | 44 (21%)  |         | 151 (73%)                                               | 55 (26%)   |         | 117 (57%)                                                            | 89 (43%)   |         |
| Gender Diverse                                          | 1 (100%)                                | 0 (0%)    |         | 1 (100%)                                                | 0 (0%)     |         | 1 (100%)                                                             | 0 (0%)     |         |
| Missing                                                 | 2                                       | 2         |         | 3                                                       | 1          |         | 2                                                                    | 2          |         |
| <b>When did you graduate from nursing school, n (%)</b> |                                         |           | 0.25    |                                                         |            | 0.45    |                                                                      |            | 0.40    |
| <2 years                                                | 9 (64%)                                 | 5 (36%)   |         | 10 (71%)                                                | 4 (29%)    |         | 11 (79%)                                                             | 3 (21%)    |         |
| 2-5 years                                               | 28 (88%)                                | 4 (13%)   |         | 25 (78%)                                                | 7 (22%)    |         | 17 (53%)                                                             | 15 (47%)   |         |
| 6-10 years                                              | 31 (80%)                                | 8 (21%)   |         | 32 (82%)                                                | 7 (18%)    |         | 23 (59%)                                                             | 16 (41%)   |         |
| 11-15 years                                             | 29 (85%)                                | 5 (15%)   |         | 27 (79%)                                                | 7 (21%)    |         | 20 (59%)                                                             | 14 (41%)   |         |
| 16+ years                                               | 91 (74%)                                | 32 (26%)  |         | 85 (69%)                                                | 38 (30.9%) |         | 64 (52%)                                                             | 59 (48%)   |         |
| <b>When did you begin working at UHN, n (%)</b>         |                                         |           | 0.38    |                                                         |            | 0.83    |                                                                      |            | 0.92    |
| <2 years                                                | 17 (68%)                                | 8 (32%)   |         | 18 (72%)                                                | 7 (28%)    |         | 15 (60%)                                                             | 10 (40%)   |         |
| 2-5 years                                               | 38 (81%)                                | 9 (19%)   |         | 37 (79%)                                                | 10 (21%)   |         | 28 (60%)                                                             | 19 (40%)   |         |
| 6-10 years                                              | 20 (71%)                                | 8 (29%)   |         | 20 (71%)                                                | 8 (29%)    |         | 15 (54%)                                                             | 13 (46%)   |         |
| 11-15 years                                             | 42 (86%)                                | 7 (14%)   |         | 38 (78%)                                                | 11 (22%)   |         | 25 (51%)                                                             | 24 (49%)   |         |
| 16+ years                                               | 71 (76%)                                | 22 (24%)  |         | 66 (71%)                                                | 27 (29%)   |         | 52 (60%)                                                             | 41 (44%)   |         |
| <b>Employment status at UNH, n (%)</b>                  |                                         |           | 0.47    |                                                         |            | 0.55    |                                                                      |            | 0.052   |
| Full-time permanent                                     | 156 (79%)                               | 41 (21%)  |         | 148 (75%)                                               | 49 (25%)   |         | 111 (56%)                                                            | 86 (44%)   |         |
| Part-time permanent                                     | 26 (72%)                                | 10 (28%)  |         | 24 (67%)                                                | 12 (33%)   |         | 16 (44%)                                                             | 20 (56%)   |         |
| Casual, temp, other                                     | 6 (67%)                                 | 3 (33%)   |         | 7 (78%)                                                 | 2 (22%)    |         | 8 (89%)                                                              | 1 (11%)    |         |
| Missing                                                 | 0                                       | 0         |         | 0                                                       | 0          |         | 0                                                                    | 0          |         |

|                                                                             |           |          |        |           |          |        |          |          |
|-----------------------------------------------------------------------------|-----------|----------|--------|-----------|----------|--------|----------|----------|
| <b>Work Area, n (%)</b>                                                     |           |          | 0.08   |           |          | 0.06   |          | 0.51     |
| Out-patient Clinic                                                          | 10 (77%)  | 3 (23%)  |        | 6 (46%)   | 7 (54%)  |        | 6 (46%)  | 7 (54%)  |
| In-patient Ward                                                             | 86 (85%)  | 15 (15%) |        | 79 (78%)  | 22 (22%) |        | 61 (60%) | 40 (40%) |
| Critical Care (CVICU, CICU)                                                 | 74 (74%)  | 26 (26%) |        | 76 (76%)  | 24 (24%) |        | 56 (56%) | 44 (44%) |
| Cath lab or Int Radiology                                                   | 11 (58%)  | 8 (42%)  |        | 11 (58%)  | 8 (42%)  |        | 8 (42%)  | 11 (58%) |
| Other                                                                       | 7 (78%)   | 2 (22%)  |        | 7 (78%)   | 2 (22%)  |        | 4 (44%)  | 5 (55%)  |
| Missing                                                                     | 0         | 0        |        | 0         | 0        |        | 0        | 0        |
| <b>Rate satisfaction with EMR, n (%)</b>                                    |           |          | 0.16   |           |          | 0.20   |          | 0.11     |
| Very unsatisfied                                                            | 29 (83%)  | 6 (17%)  |        | 28 (80%)  | 7 (20%)  |        | 25 (71%) | 10 (29%) |
| Somewhat unsatisfied                                                        | 41 (77%)  | 12 (23%) |        | 44 (83%)  | 9 (17%)  |        | 29 (55%) | 24 (45%) |
| Neutral                                                                     | 36 (86%)  | 6 (14%)  |        | 29 (69%)  | 13 (31%) |        | 23 (55%) | 19 (45%) |
| Somewhat satisfied                                                          | 58 (77%)  | 17 (23%) |        | 55 (73%)  | 20 (27%) |        | 41 (55%) | 34 (45%) |
| Very satisfied                                                              | 15 (60%)  | 10 (40%) |        | 15 (60%)  | 10 (40%) |        | 9 (36%)  | 16 (64%) |
| Missing                                                                     | 9         | 3        |        | 8         | 4        |        | 8        | 4        |
| <b>Somewhat / very satisfied with EHR (vs. neutral / unsatisfied), n(%)</b> |           |          | 0.12   |           |          | 0.19   |          | 0.16     |
| Yes                                                                         | 73 (73%)  | 27 (27%) |        | 70 (70%)  | 30 (30%) |        | 50 (50%) | 50 (50%) |
| No                                                                          | 106 (82%) | 24 (19%) |        | 101 (78%) | 29 (22%) |        | 77 (59%) | 53 (40%) |
| Missing                                                                     | 9         | 3        |        | 8         | 4        |        | 8        | 4        |
| <b>Staffing levels in this work setting are sufficient, n (%)</b>           |           |          | 0.0004 |           |          | 0.0097 |          | 0.017    |
| Disagree strongly                                                           | 101 (89%) | 13 (11%) |        | 92 (81%)  | 22 (19%) |        | 75 (66%) | 39 (34%) |
| Disagree somewhat                                                           | 44 (70%)  | 19 (30%) |        | 45 (71%)  | 18 (29%) |        | 30 (48%) | 33 (52%) |
| Neutral                                                                     | 14 (82%)  | 3 (18%)  |        | 15 (88%)  | 2 (12%)  |        | 9 (53%)  | 8 (47%)  |
| Agree somewhat                                                              | 17 (55%)  | 14 (45%) |        | 16 (52%)  | 15 (48%) |        | 11 (36%) | 20 (64%) |
| Agree strongly                                                              | 3 (60%)   | 2 (40%)  |        | 3 (60%)   | 2 (40%)  |        | 2 (40%)  | 3 (60%)  |
| Missing                                                                     | 9         | 3        |        | 8         | 4        |        | 8        | 4        |

|                                                                                                            |           |          |        |           |          |           |          |
|------------------------------------------------------------------------------------------------------------|-----------|----------|--------|-----------|----------|-----------|----------|
| <b>Somewhat/strongly agree staffing levels in work setting are adequate (vs. neutral / disagree), n(%)</b> |           |          | 0.0005 |           | 0.0013   |           | 0.012    |
| Yes                                                                                                        | 20 (56%)  | 16 (44%) |        | 19 (53%)  | 17 (47%) | 13 (36%)  | 23 (64%) |
| No                                                                                                         | 159 (82%) | 35 (18%) |        | 152 (78%) | 42 (22%) | 114 (59%) | 80 (41%) |
| Missing                                                                                                    | 9         | 3        |        | 8         | 4        | 8         | 4        |
| <b>I am treated fairly in the workplace, n (%)</b>                                                         |           |          | 0.0004 |           | 0.0001   |           | <.0001   |
| Disagree strongly                                                                                          | 38 (93%)  | 3 (7%)   |        | 36 (88%)  | 5 (12%)  | 32 (78%)  | 9 (22%)  |
| Disagree somewhat                                                                                          | 35 (92%)  | 3 (8%)   |        | 35 (92%)  | 3 (8%)   | 27 (71%)  | 11 (29%) |
| Neutral                                                                                                    | 26 (79%)  | 7 (21%)  |        | 23 (70%)  | 10 (30%) | 15 (46%)  | 18 (54%) |
| Agree somewhat                                                                                             | 57 (73%)  | 21 (27%) |        | 57 (73%)  | 21 (27%) | 42 (54%)  | 36 (46%) |
| Agree strongly                                                                                             | 23 (58%)  | 17 (42%) |        | 20 (50%)  | 20 (50%) | 11 (28%)  | 29 (72%) |
| Missing                                                                                                    | 9         | 3        |        | 8         | 4        | 8         | 4        |
| <b>Somewhat / strongly agree I am treated fairly (vs. neutral / disagree), n (%)</b>                       |           |          | 0.0002 |           | 0.0012   |           | 0.0013   |
| Yes                                                                                                        | 80 (68%)  | 38 (32%) |        | 77 (65%)  | 41 (35%) | 53 (45%)  | 65 (55%) |
| No                                                                                                         | 99 (89%)  | 13 (11%) |        | 94 (84%)  | 18 (16%) | 74 (66%)  | 38 (34%) |
| Missing                                                                                                    | 9         | 3        |        | 8         | 4        | 8         | 4        |

| Have you fallen asleep while sitting inactive in a public place |                                                         |         | Have you felt that things were piling up so high you could not overcome them |                                                          |         | Have you been bothered by emotional problems              |                                                        |         | Has physical health interfered with ability to do daily work |                                                          |         |
|-----------------------------------------------------------------|---------------------------------------------------------|---------|------------------------------------------------------------------------------|----------------------------------------------------------|---------|-----------------------------------------------------------|--------------------------------------------------------|---------|--------------------------------------------------------------|----------------------------------------------------------|---------|
| Yes<br>(N=93)                                                   | No<br>(N=149)                                           | P-value | Yes<br>(N=115)                                                               | No<br>(N=127)                                            | P-value | Yes<br>(N=191)                                            | No<br>(N=51)                                           | P-value | Yes<br>(N=108)                                               | No<br>(N=134)                                            | P-value |
| 15 (48%)<br>77 (37%)<br>0 (0%)<br>1                             | 16 (52%)<br>129 (63%)<br>1 (100%)<br>3                  | 0.37    | 14 (45%)<br>98 (48%)<br>1 (10%)<br>2                                         | 17 (55%)<br>108 (52%)<br>0 (0%)<br>2                     | 0.56    | 25 (81%)<br>162 (79%)<br>1 (100%)<br>3                    | 6 (19%)<br>44 (21%)<br>0 (0%)<br>1                     | 0.85    | 16 (52%)<br>88 (43%)<br>1 (100%)<br>3                        | 15 (48%)<br>118 (57%)<br>0 (0%)<br>1                     | 0.34    |
| 10 (71%)<br>17 (53%)<br>15 (39%)<br>14 (41%)<br>37 (30%)        | 4 (29%)<br>15 (47%)<br>24 (61%)<br>20 (59%)<br>86 (70%) | 0.011   | 7 (50%)<br>16 (50%)<br>14 (36%)<br>20 (59%)<br>58 (47%)                      | 7 (50%)<br>16 (50%)<br>25 (64%)<br>14 (41%)<br>65 (53%)  | 0.41    | 14 (100%)<br>25 (78%)<br>33 (85%)<br>28 (82%)<br>91 (74%) | 0 (0%)<br>7 (22%)<br>6 (15%)<br>6 (18%)<br>32 (26%)    | 0.16    | 6 (43%)<br>16 (50%)<br>16 (41%)<br>17 (50%)<br>53 (43%)      | 8 (57%)<br>16 (50%)<br>23 (59%)<br>17 (50%)<br>70 (57%)  | 0.89    |
| 16 (64%)<br>20 (43%)<br>9 (32%)<br>17 (35%)<br>31 (33%)         | 9 (36%)<br>27 (57%)<br>19 (68%)<br>32 (65%)<br>62 (67%) | 0.061   | 12 (48%)<br>20 (43%)<br>12 (43%)<br>26 (53%)<br>45 (48%)                     | 13 (52%)<br>27 (57%)<br>16 (57%)<br>23 (47%)<br>48 (52%) | 0.85    | 22 (88%)<br>37 (79%)<br>24 (86%)<br>38 (78%)<br>70 (75%)  | 3 (12%)<br>10 (21%)<br>4 (14%)<br>11 (22%)<br>23 (25%) | 0.59    | 12 (48%)<br>23 (49%)<br>9 (32%)<br>25 (51%)<br>39 (42%)      | 13 (52%)<br>24 (51%)<br>19 (68%)<br>24 (49%)<br>54 (58%) | 0.51    |
| 77 (39%)<br>14 (39%)<br>2 (22%)<br>0                            | 120 (61%)<br>22 (61%)<br>7 (78%)<br>0                   | 0.60    | 91 (46%)<br>18 (50%)<br>6 (67%)<br>0                                         | 106 (54%)<br>18 (50%)<br>3 (33%)<br>0                    | 0.46    | 156 (79%)<br>27 (75%)<br>8 (89%)<br>0                     | 41 (20.8%)<br>9 (25.0%)<br>1 (11.1%)<br>0              | 0.64    | 87 (44%)<br>16 (44%)<br>5 (56%)<br>0                         | 110 (56%)<br>20 (56%)<br>4 (44%)<br>0                    | 0.80    |

|                                                                                                                                                    |                                                                                                                                                      |                                                                                                                                                    |                                                                                                                                                     |
|----------------------------------------------------------------------------------------------------------------------------------------------------|------------------------------------------------------------------------------------------------------------------------------------------------------|----------------------------------------------------------------------------------------------------------------------------------------------------|-----------------------------------------------------------------------------------------------------------------------------------------------------|
| <p>0.51</p> <p>6 (46%) 7 (54%)</p> <p>42 (42%) 59 (58%)</p> <p>38 (38%) 62 (62%)</p> <p>4 (21%) 15 (79%)</p> <p>3 (33%) 6 (67%)</p> <p>0 0</p>     | <p>0.49</p> <p>6 (46%) 7 (54%)</p> <p>53 (52%) 48 (48%)</p> <p>45 (45%) 55 (55%)</p> <p>6 (32%) 13 (68%)</p> <p>5 (56%) 4 (44%)</p> <p>0 0</p>       | <p>0.62</p> <p>9 (69%) 4 (31%)</p> <p>83 (82%) 18 (18%)</p> <p>79 (79%) 21 (21%)</p> <p>13 (68%) 6 (32%)</p> <p>7 (78%) 2 (22%)</p> <p>0 0</p>     | <p>0.087</p> <p>3 (23%) 10 (77%)</p> <p>48 (48%) 53 (52%)</p> <p>49 (49%) 51 (51%)</p> <p>7 (37%) 12 (63%)</p> <p>1 (11%) 8 (89%)</p> <p>0 0</p>    |
| <p>0.56</p> <p>16 (46%) 19 (54%)</p> <p>20 (38%) 33 (62%)</p> <p>14 (33%) 28 (67%)</p> <p>32 (43%) 43 (57%)</p> <p>7 (28%) 18 (72%)</p> <p>4 8</p> | <p>0.055</p> <p>22 (63%) 13 (37%)</p> <p>30 (57%) 23 (43%)</p> <p>14 (33%) 28 (67%)</p> <p>32 (43%) 43 (57%)</p> <p>11 (44%) 14 (56%)</p> <p>6 6</p> | <p>0.012</p> <p>33 (94%) 2 (6%)</p> <p>42 (79%) 11 (21%)</p> <p>36 (86%) 6 (14%)</p> <p>55 (73%) 20 (27%)</p> <p>15 (60%) 10 (40%)</p> <p>10 2</p> | <p>0.23</p> <p>21 (60%) 14 (40%)</p> <p>26 (49%) 27 (51%)</p> <p>19 (45%) 23 (55%)</p> <p>28 (37%) 47 (63%)</p> <p>10 (40%) 15 (60%)</p> <p>4 8</p> |
| <p>0.93</p> <p>39 (39%) 61 (61%)</p> <p>50 (39%) 80 (61%)</p> <p>4 8</p>                                                                           | <p>0.24</p> <p>43 (43%) 57 (57%)</p> <p>66 (51%) 64 (49%)</p> <p>6 6</p>                                                                             | <p>0.0047</p> <p>70 (70%) 30 (30%)</p> <p>111 (85%) 19 (15%)</p> <p>10 2</p>                                                                       | <p>0.054</p> <p>38 (38%) 62 (62%)</p> <p>66 (51%) 64 (49%)</p> <p>4 8</p>                                                                           |
| <p>0.14</p> <p>41 (36%) 73 (64%)</p> <p>27 (43%) 36 (57%)</p> <p>10 (59%) 7 (41%)</p> <p>11 (36%) 20 (64%)</p> <p>0 (0%) 5 (100%)</p> <p>4 8</p>   | <p>0.0026</p> <p>68 (60%) 46 (40%)</p> <p>21 (33%) 42 (67%)</p> <p>9 (53%) 8 (47%)</p> <p>9 (29%) 22 (71%)</p> <p>2 (40%) 3 (60%)</p> <p>6 6</p>     | <p>0.014</p> <p>97 (85%) 17 (15%)</p> <p>47 (75%) 16 (25%)</p> <p>15 (88%) 2 (12%)</p> <p>20 (65%) 11 (35%)</p> <p>2 (40%) 3 (60%)</p> <p>10 2</p> | <p>0.075</p> <p>62 (54%) 52 (46%)</p> <p>22 (35%) 41 (65%)</p> <p>7 (41%) 10 (59%)</p> <p>12 (39%) 19 (61%)</p> <p>1 (20%) 4 (80%)</p> <p>4 8</p>   |

|                                                                                                              |                                                                                                              |                                                                                                           |                                                                                                             |
|--------------------------------------------------------------------------------------------------------------|--------------------------------------------------------------------------------------------------------------|-----------------------------------------------------------------------------------------------------------|-------------------------------------------------------------------------------------------------------------|
| 0.27                                                                                                         | 0.028                                                                                                        | 0.0050                                                                                                    | 0.23                                                                                                        |
| 11 (31%) 25 (69%)<br>78 (40%) 116 (60%)<br>4 8                                                               | 11 (31%) 25 (69%)<br>98 (51%) 96 (49%)<br>6 6                                                                | 22 (61%) 14 (39%)<br>159 (82%) 35 (18%)<br>10 2                                                           | 13 (36%) 23 (64%)<br>91 (47%) 103 (53%)<br>4 8                                                              |
| 0.44                                                                                                         | 0.0003                                                                                                       | 0.0038                                                                                                    | 0.0004                                                                                                      |
| 14 (34%) 27 (66%)<br>19 (50%) 19 (50%)<br>13 (39%) 20 (61%)<br>31 (40%) 47 (60%)<br>12 (30%) 28 (70%)<br>4 8 | 31 (76%) 10 (24%)<br>20 (53%) 18 (47%)<br>16 (49%) 17 (51%)<br>30 (39%) 48 (61%)<br>12 (30%) 28 (70%)<br>6 6 | 39 (95%) 2 (5%)<br>31 (82%) 7 (18%)<br>27 (82%) 6 (18%)<br>60 (77%) 18 (23%)<br>24 (60%) 16 (40%)<br>10 2 | 29 (71%) 12 (29%)<br>17 (45%) 21 (55%)<br>12 (36%) 21 (64%)<br>37 (47%) 41 (53%)<br>9 (23%) 31 (77%)<br>4 8 |
| 0.47                                                                                                         | 0.0002                                                                                                       | 0.0043                                                                                                    | 0.051                                                                                                       |
| 43 (36%) 75 (64%)<br>46 (41%) 66 (59%)<br>4 8                                                                | 42 (36%) 76 (64%)<br>67 (60%) 45 (40%)<br>6 6                                                                | 84 (71%) 34 (29%)<br>97 (87%) 15 (13%)<br>10 2                                                            | 46 (39%) 72 (61%)<br>58 (52%) 54 (48%)<br>4 8                                                               |

**Work I do is meaningful to me  
(categorized)**

**Work schedule leaves enough time  
for personal life (categorized)**

| 1-2<br>(N=3) | 3-5<br>(N=67) | 6-7<br>(N=172) | P-value | 1-2<br>(N=110) | 3<br>(N=45) | 4-5<br>(N=87) | P-value |
|--------------|---------------|----------------|---------|----------------|-------------|---------------|---------|
| 1 (3%)       | 12 (39%)      | 18 (58%)       | 0.40    | 10 (32.3%)     | 8 (25.8%)   | 13 (42%)      | 0.36    |
| 2 (1%)       | 53 (26%)      | 151 (73%)      |         | 97 (47.1%)     | 36 (17.5%)  | 73 (35%)      |         |
| 0 (0%)       | 0 (0%)        | 1 (100%)       |         | 0 (0.0%)       | 0 (0.0%)    | 1 (100%)      |         |
| 0            | 2             | 2              |         | 3              | 1           | 0             |         |
| 0 (0%)       | 3 (21%)       | 11 (79%)       | 0.45    | 9 (64%)        | 2 (14%)     | 3 (21%)       | 0.82    |
| 1 (3%)       | 11 (34%)      | 20 (63%)       |         | 17 (53%)       | 6 (19%)     | 9 (28%)       |         |
| 1 (3%)       | 14 (36%)      | 24 (62%)       |         | 18 (46%)       | 7 (18%)     | 14 (36%)      |         |
| 0 (0%)       | 12 (35%)      | 22 (65%)       |         | 13 (38%)       | 8 (24%)     | 13 (38%)      |         |
| 1 (1%)       | 27 (22%)      | 95 (77%)       |         | 53 (43%)       | 22 (18%)    | 48 (39%)      |         |
|              |               |                |         |                |             |               |         |
| 0 (0%)       | 7 (28%)       | 18 (72%)       | 0.28    | 13 (52%)       | 4 (16%)     | 8 (32%)       | 0.84    |
| 2 (4%)       | 15 (32%)      | 30 (64%)       |         | 26 (55%)       | 7 (15%)     | 14 (30%)      |         |
| 0 (0%)       | 11 (39%)      | 17 (61%)       |         | 13 (46%)       | 6 (21%)     | 9 (32%)       |         |
| 0 (0%)       | 15 (31%)      | 34 (69%)       |         | 19 (39%)       | 11 (22%)    | 19 (39%)      |         |
| 1 (1%)       | 19 (20%)      | 73 (79%)       |         | 39 (42%)       | 17 (18%)    | 37 (40%)      |         |
|              |               |                |         |                |             |               |         |
| 3 (2%)       | 54 (27%)      | 140 (71%)      | 0.94    | 91 (46%)       | 36 (18%)    | 70 (36%)      | 0.81    |
| 0 (0.0%)     | 10 (28%)      | 26 (72%)       |         | 16 (44%)       | 6 (17%)     | 14 (39%)      |         |
| 0 (0.0%)     | 3 (33%)       | 6 (67%)        |         | 3 (33%)        | 3 (33%)     | 3 (33%)       |         |
| 0            | 0             | 0              |         | 0              | 0           | 0             |         |



|        |          |          |          |          |          |
|--------|----------|----------|----------|----------|----------|
| 0.95   |          |          | 0.063    |          |          |
| 0 (0%) | 3 (23%)  | 10 (77%) | 5 (39%)  | 2 (15%)  | 6 (46%)  |
| 2 (2%) | 28 (28%) | 71 (70%) | 56 (55%) | 11 (11%) | 34 (34%) |
| 1 (1%) | 29 (29%) | 70 (70%) | 36 (36%) | 28 (28%) | 36 (36%) |
| 0 (0%) | 6 (32%)  | 13 (68%) | 10 (53%) | 3 (16%)  | 6 (32%)  |
| 0 (0%) | 1 (11%)  | 8 (89%)  | 3 (33%)  | 1 (11%)  | 5 (57%)  |
| 0      | 0        | 0        | 0        | 0        | 0        |
| 0.32   |          |          | 0.0087   |          |          |
| 1 (3%) | 15 (43%) | 19 (54%) | 25 (71%) | 3 (9%)   | 7 (20%)  |
| 1 (2%) | 11 (21%) | 41 (77%) | 24 (45%) | 10 (19%) | 19 (36%) |
| 0 (0%) | 12 (29%) | 30 (71%) | 17 (41%) | 11 (26%) | 14 (33%) |
| 1 (1%) | 23 (31%) | 51 (68%) | 34 (45%) | 12 (16%) | 29 (39%) |
| 0 (0%) | 4 (16%)  | 21 (84%) | 5 (20%)  | 4 (16%)  | 16 (64%) |
| 0      | 2        | 10       | 5        | 5        | 2        |
| 0.87   |          |          | 0.082    |          |          |
| 1 (1%) | 27 (27%) | 72 (72%) | 39 (39%) | 16 (16%) | 45 (45%) |
| 2 (2%) | 38 (29%) | 90 (69%) | 66 (51%) | 24 (19%) | 40 (31%) |
| 0      | 2        | 10       | 5        | 5        | 2        |
| 0.85   |          |          | <.0001   |          |          |
| 3 (3%) | 34 (30%) | 77 (68%) | 71 (62%) | 20 (18%) | 23 (20%) |
| 0 (0%) | 18 (29%) | 45 (71%) | 22 (35%) | 11 (18%) | 30 (48%) |
| 0 (0%) | 5 (29%)  | 12 (71%) | 3 (18%)  | 5 (29%)  | 9 (53%)  |
| 0 (0%) | 7 (23%)  | 24 (77%) | 7 (23%)  | 4 (13%)  | 20 (65%) |
| 0 (0%) | 1 (20%)  | 4 (80%)  | 2 (40%)  | 0 (0%)   | 3 (60%)  |
| 0      | 2        | 10       | 5        | 5        | 2        |

|        |          |           |          |          |          |
|--------|----------|-----------|----------|----------|----------|
| 0.49   |          |           | 0.0013   |          |          |
| 0 (0%) | 8 (22%)  | 28 (78%)  | 9 (25%)  | 4 (11%)  | 23 (64%) |
| 3 (2%) | 57 (29%) | 134 (69%) | 96 (50%) | 36 (19%) | 62 (32%) |
| 0      | 2        | 10        | 5        | 5        | 2        |
| 0.40   |          |           | <.0001   |          |          |
| 1 (2%) | 15 (37%) | 25 (61%)  | 31 (76%) | 6 (15%)  | 4 (10%)  |
| 1 (3%) | 11 (30%) | 26 (68%)  | 17 (45%) | 5 (13%)  | 16 (42%) |
| 0 (0%) | 13 (39%) | 20 (60%)  | 14 (42%) | 8 (24%)  | 11 (33%) |
| 1 (1%) | 19 (24%) | 58 (74%)  | 36 (46%) | 15 (19%) | 27 (35%) |
| 0 (0%) | 7 (18%)  | 33 (82%)  | 7 (18%)  | 6 (15%)  | 27 (67%) |
| 0      | 2        | 10        | 5        | 5        | 2        |
| 0.073  |          |           | 0.0082   |          |          |
| 1 (1%) | 26 (22%) | 91 (77%)  | 43 (36%) | 21 (18%) | 54 (46%) |
| 2 (2%) | 39 (35%) | 71 (63%)  | 62 (55%) | 19 (17%) | 31 (28%) |
| 0      | 2        | 10        | 5        | 5        | 2        |
