# Supplementary material for: Burnout and distress among nurses in a cardiovascular centre of a quaternary hospital network: a cross-sectional survey
Source: PubMed Central journal article supplement — CMAJ Open. 2021 Jan 12;9(1):E19–28. doi: 10.9778/cmajo.20200058 (PMC7843080; doi:10.9778/cmajo.20200058), 2021-01-12
Supplement: supp_9.1.E19_2020-0058-original-submission.pdf [file supp_9.1.E19_2020-0058-original-submission.pdf]

## Burnout and Distress among Nurses in the Peter Munk Cardiac Centre

Barry Rubin MD PhD, Rebecca Goldfarb PhD, Daniel Satele MSc and Leanna Graham, BScPT  
MHSc

Background: Burnout has a negative impact on the mental health of nurses and the care they provide. This study documents burnout and distress levels in cardiovascular nurses at a quaternary referral hospital.

Methods: Nurses were invited to complete the nine-question WellBeing Index (WBI) survey, which measures fatigue, depression, burnout, anxiety/stress, and mental/physical quality of life. Demographics, work culture items and survey responses were compared between and within nursing groups. Multivariable logistic regression identified independent associations between demographics, workplace characteristics and high WBI scores.

Results: 242/493 (49%) of nurses completed the survey. Nurses reporting burnout (79%) were more likely to document insufficient staffing levels (82%,  $p=0.0005$ ) or being treated unfairly (88%,  $p=0.0002$ ). Nurses endorsed WBI scores  $\geq 2$  (78%) or  $\geq 4$  (55%), indicative of high or severe distress, respectively. Nurses endorsed a high WBI score if dissatisfied with the electronic health record (EHR,  $p=0.0029$ ), or they perceived insufficient staffing levels or unfair treatment (both  $p<0.0001$ ). Nurses graduating  $<16$  years ago had 2.7-fold higher odds of a high WBI score (95% CI 1.1–6.7,  $p=0.034$ ), while nurses who perceived adequate staffing levels had an odds ratio for a high WBI score of 0.27 (95% CI 0.11–0.64,  $p=0.0028$ ).

Interpretation: Perception of inadequate staffing levels and being treated unfairly correlated with nursing burnout. Dissatisfaction with the EHR, insufficient staffing levels, unfair treatment and being on staff less than 16 years were associated with high distress scores. Addressing these institutional factors could decrease burnout and distress among nurses and improve their work experience and patient outcomes.

## Introduction

Burnout is a work-related syndrome characterized by emotional exhaustion, a sense of reduced personal accomplishment and depersonalization that may manifest as negativity, cynicism, and the inability to express empathy or grief.(1, 2) Burnout negatively impacts nurses' physical and mental health, increases nursing turnover rates and is associated with poor job performance and threats to patient safety, and is more prevalent in hospitals with a higher number of patients per nurse.(3-5) Over 20% of nurses are at risk of post-traumatic stress disorder as a result of workplace mistreatment, and nearly half of all nurses experience burnout in some form, a rate more than twice that among professionals in other fields.(6) For these reasons, burnout among nurses and other health care professionals is a public health crisis.(2)

Multiple validated survey instruments, including the Maslach Burnout Index(1, 7) and the Well Being Index (WBI) survey(8, 9) can measure burnout and other dimensions of distress in nurses. With the 9-item WBI survey, a WBI score  $\geq 2$  identifies nurses with high levels of overall distress.(9) The 9-item WBI survey can also identify nurses who are doing well (high overall quality of life, high degree of meaning in work, satisfied with work–life balance), and nurses whose degree of distress increases their risk of adverse professional consequences, such as patient care errors, professional dissatisfaction and intent to leave their job.(9)

We used the WBI survey to assess the prevalence of burnout and overall distress in nurses in the Peter Munk Cardiac Center (PMCC) at Toronto General Hospital and Toronto Western Hospital. The relationship between nurses' responses to individual WBI survey questions and their gender, years in practice, area of practice, satisfaction with the hospitals electronic health record, perception of the adequacy of staffing levels, being treated fairly in the workplace, work-life integration and meaning in work were evaluated, and the demographic and environmental factors that predicted high nurse WBI scores were assessed. Then, we compared responses to the WBI survey endorsed by nurses in the PMCC with nurses in practice at academic health science centers in the United States that have completed this survey.

## Methods

After placing posters in multiple areas across the PMCC describing the WBI survey (Appendix 1), an independent third party (Canadian Viewpoint) sent e-mail invitations (Appendix 2) to complete the WBI survey to the 493 nurses that practice in the PMCC. Neither UHN or the study authors had access to individual responses to the WBI survey, which were collected by CWS, 3014 Allegro Park LN SW, Rochester, MN 55902 <https://www.mededwebs.com/well-being-index>. The 9 questions in the WBI survey, which assigns a range of scores from -2 to +9 have previously been described.(8, 10) The ability of the WBI survey to measure dimensions of distress, including fatigue, depression, burnout, anxiety/stress, and mental/physical quality of life has been validated in a sample of 812 nurses.(9)

Study participants were also asked to rate how satisfied they are with the electronic health record using a 5-point Likert scale, with "very unsatisfied" yielding a score of -2, and "very

1  
2  
3 satisfied” a score of + 2. Participants were also asked to rate the statements “staffing levels in  
4 this work setting are sufficient to handle the number of patients” and “I am treated fairly in the  
5 workplace”, also using a 5-point Likert scale, with “strongly disagree” yielding a score of -2, and  
6 “strongly agree” a score of + 2  
7  
8

9  
10 Upon completion of the survey questions, nurses received instantaneous feedback via e-mail in  
11 the form of a dashboard that quantified each dimension of distress, and that compared the  
12 results for each individual nurse with all other nurses that have completed the WBI survey. If a  
13 high WBI score indicative of distress was identified, i.e.  $\geq 2$ , (9) the e-mail response to individual  
14 study participants included the information required to access the local, regional and provincial  
15 resources that provide assistance managing stress and resilience, fatigue, emotional concerns,  
16 suicidal thoughts, issues related to relationships and work-life balance, and to alcohol or  
17 substance abuse.  
18

19  
20 Statistical analysis. We used standard univariate statistical comparisons using Chi-square or  
21 Kruskal-Wallis tests as appropriate to describe this sample of nurses. We compared selected  
22 demographics, work culture items and elements of the WBI survey. Multivariable logistic  
23 regression was used to identify independent associations between demographic and workplace  
24 characteristics and a high WBI survey score, and odds ratios and confidence intervals were  
25 calculated for the association of each independent predictor of a high WBI score. We then  
26 evaluated univariate associations among WBI data from nurses in practice at academic health  
27 science centers (AHSCs) in the United States in comparison to nurses in practice at the PMCC.  
28 For this analysis, we defined AHSCs as academic/learning hospitals that deliver basic and clinical  
29 research, education to health professionals and clinical care to patients.(11) All analyses were  
30 conducted using SAS Version 9.  
31  
32  
33

34  
35 Ethics. This study was reviewed by the University Health Network Research Ethics Board as a  
36 quality improvement study.  
37  
38

## 39 **Results**

40  
41 WBI survey response rate and demographics. Of the 493 nurses who received a request to  
42 complete the WBI survey, 242 (49.1%) responded. We report nurses’ gender, years since  
43 graduation from nursing school, years working at UHN, primary practice location and  
44 employment status in Table 1.  
45  
46

47 Distribution of nurse WBI scores. The mean WBI score for all nurses was  $3.5 \pm 0.17$  (mean  $\pm$   
48 SD). Figure 1 shows the proportion of nurses endorsing each WBI score. Overall, 78% of nurses  
49 recorded a WBI score  $\geq 2$ , and 55% of nurses endorsed a WBI score  $\geq 4$ .  
50  
51

52 Response to individual questions in the WBI survey. One hundred eighty eight of 242 nurses  
53 (78%) responded that they felt burned out from their work, 191/242 (79%) noted they were  
54 bothered by emotional problems, and 179/242 (74%) replied that they were worried that work  
55 is hardening them emotionally, while 87/242 (36%) of nurses agreed or strongly agreed that  
56  
57

1  
2  
3 their work schedule leaves them enough time for their personal life. Responses to the  
4 remaining WBI survey questions appear in Table 2.  
5

6  
7 Next, we evaluated the relationship between nurses' perception of their workplace  
8 environment (sufficiency of staffing levels, being treated fairly, and satisfaction with the  
9 electronic health record) and their responses to individual questions in the WBI survey (Table  
10 2). Nurses whose response was neutral or who somewhat or strongly disagreed that staffing  
11 levels in the work setting are sufficient were more likely to feel burned out (82%,  $p = 0.0005$ ),  
12 be bothered by emotional problems (80%,  $p = 0.005$ ), worry that work is hardening them  
13 emotionally (78%,  $p = 0.0013$ ), often feel down, depressed, or hopeless (59%,  $p = 0.012$ ), or feel  
14 that things were piling up so high they could not overcome them (51%,  $p = 0.028$ ), and report  
15 that their work schedule leaves enough time for their personal life (50%,  $p = 0.0013$ ).  
16  
17  
18

19 Nurses who responded as neutral or who somewhat or strongly disagreed that they are treated  
20 fairly in the workplace were more likely to feel burned out from their work (88%,  $p = 0.0002$ ),  
21 be bothered by emotional problems (87%,  $p = 0.0043$ ), worry that work is hardening them  
22 emotionally (84%,  $p = 0.0012$ ), feel down, depressed, or hopeless (66%,  $p = 0.0013$ ), feel that  
23 things were piling up so high they could not overcome them (60%,  $p = 0.0002$ ), or report that  
24 their work schedule leaves enough time for personal life (55%,  $p = 0.0082$ ).  
25  
26  
27

28 Nurses who responded neutral or were somewhat or strongly unsatisfied with the electronic  
29 health record were more likely to report that they have been bothered by emotional problems  
30 (58%,  $p = 0.012$ ), and were more likely to disagree or strongly disagree that their work schedule  
31 leaves enough time for their personal life (60%,  $p = 0.0087$ ). The number of times nurses  
32 accessed contact information for local, regional or provincial resources that help manage each  
33 element of distress is presented in Figure 2.  
34  
35

36 Predictors of high physician WBI scores. Nurses were more likely to endorse a WBI score of  $\geq 2$  if  
37 they were dissatisfied with the electronic health record ( $p = 0.0029$ ), disagreed that staffing  
38 levels are sufficient ( $p < 0.0001$ ), or disagreed that they were treated fairly in the workplace ( $p$   
39  $< 0.0001$ , Table 3). Conversely, we did not identify any relationship between nurses with a WBI  
40 scores  $\geq 2$  and their gender, years since graduation from nursing school, years working at UHN,  
41 employment status or primary practice location.  
42  
43  
44

45 Multivariable analysis (Table 3) showed that nurses who graduated  $< 16$  years ago were 2.7-fold  
46 more likely to have a WBI score  $\geq 2$  (95% confidence interval 1.1 – 6.7,  $p = 0.034$ ), while nurses  
47 who thought staffing levels were adequate had an odds ratio for a WBI score  $\geq 2$  of 0.27 (95%  
48 confidence interval 0.11 – 0.64,  $p = 0.0028$ ).  
49

50 Comparison of WBI scores between nurses in practice in the PMCC and at AHSCs in the United  
51 States. The average WBI score was higher in the 242 PMCC nurses in this study than the 3,627  
52 nurses in practice at US AHSCs that have completed the WBI survey ( $3.6 \pm 2.61$  vs.  $2.1 \pm 2.58$ ,  $p$   
53  $< 0.0001$ , Kruskal-Wallis H test, Table 5). The percentage of nurses with a WBI score of  $\geq 2$ ,  
54 indicative of high distress, or a WBI score of  $\geq 4$ , indicative of severe distress, was higher in the  
55  
56  
57

1  
2  
3 PMCC than the comparison cohort of US nurses (79% vs. 57%,  $p < 0.0001$  and 54% vs. 32%,  $p <$   
4  $0.0001$  respectively, Chi-Square).  
5

6 Overall, nurses in the PMCC were more likely than nurses in AHSCs in the US cohort to report  
7 being bothered by emotional problems (79% vs. 64%,  $p < 0.0001$ ), feel burned out from work  
8 (78% vs. 61%,  $p < 0.0001$ ), worry that work is hardening them emotionally (74% vs. 47%,  $p <$   
9  $0.0001$ ), feel down, depressed, or hopeless (56% vs. 41%,  $p < 0.0001$ ), feel that things were  
10 piling up so high they could not overcome them (48% vs. 41%,  $p < 0.0001$ ), state their physical  
11 health interfered with their ability to do daily work (45% vs. 25%,  $p < 0.0001$ ) or fall asleep  
12 while sitting inactive in a public place (38% vs. 12%,  $p < 0.0001$ ), and were less likely to agree or  
13 strongly agree that their work schedule leaves enough time for their personal life (36% PMCC  
14 nurses vs 46% US nurses,  $p < 0.0001$ ).  
15  
16  
17

### 18 Interpretation

19  
20  
21 We used a validated survey instrument, the WBI score(9) to measure burnout and distress  
22 among nurses in practice at the PMCC. In this study, 78% of nurses reported feeling burned out  
23 from their work. The perception of inadequate staffing levels and of being treated unfairly in  
24 the workplace correlated with burnout among PMCC nurses.  
25

26  
27 A WBI score  $\geq 2$  identifies nurses with high levels of overall distress, because such scores are  
28 associated with a 4.4-fold higher likelihood of burnout, 2.4-fold higher likelihood of poor overall  
29 quality of life and intent to leave their current position (for reasons other than retirement) in  
30 the next 24 months, 2.3-fold higher likelihood of severe fatigue and 2-fold higher likelihood of  
31 reporting a recent patient error.(9) We interpreted a WBI score  $\geq 4$  to indicate severe distress,  
32 because such scores are associated with an 8.1-fold higher likelihood of burnout, 4.6-fold  
33 higher likelihood of low quality of life and intent for nurses to leave their current position in the  
34 next 24 months, 3.6-fold higher likelihood of recent suicidal ideation, 3.5-fold higher likelihood  
35 of extreme fatigue and 2.7-fold higher likelihood of reporting a recent patient care error.(9)  
36  
37  
38

39 We found that 78% of PMCC nurses endorsed a WBI score  $\geq 2$ , and 55% of nurses endorsed a  
40 WBI score  $\geq 4$ . Dissatisfaction with the EHR, insufficient staffing levels, unfair treatment and  
41 being on staff less than 16 years were associated with high distress scores among PMCC nurses.  
42 Graduation from nursing school within the last 15 years was an independent predictor of a high  
43 distress, while the perception of adequate staffing levels independently predicted low overall  
44 distress levels among nurses. Multiple other studies have confirmed high levels of burnout and  
45 distress among nurses, especially in the early phase of their career,(4, 5, 12) and have noted  
46 that nurses are 2- to 3-fold more likely to leave their job in their first 5 years of practice.(13)  
47 The observation that the well-being of nurses is directly related to the safety and quality of care  
48 that nurses provide and the rate of hospital-acquired infections, as well as nurses career  
49 satisfaction and turnover emphasizes the importance of these findings.(9, 14-16)  
50  
51  
52

53  
54 We found that nurses in practice at the PMCC had higher overall WBI scores and a greater  
55 percentage of WBI scores indicative of high or severe distress than their counterparts in  
56  
57

1  
2  
3 practice at AHSCs in the United States (Table 5). The reasons for this dichotomy are not clear  
4 but could relate to differences in the Canadian and US health care systems. For example, while  
5 the number of nurses per 1,000 population (10.8 vs. 11.2, respectively) and number of hospital  
6 beds per 10,000 population (27 vs. 28) are similar, nursing income (\$55,260 vs. \$70,610) is  
7 lower in Canada than in the US,(17) and the percent occupancy of acute care beds is  
8 consistently higher in Canadian than US hospitals (91% vs. 64% in 2000, 92% vs. 63% in  
9 2015).(18) Therefore, personal financial pressures and crowded hospital environments might  
10 have contributed to the differences in burnout and distress scores between nurses in practice  
11 in the PMCC and in US AHSCs that we observed.  
12  
13  
14

15 Another possible explanation for the high WBI scores in PMCC nurses is that the work  
16 environment in the PMCC is more challenging than in other AHSCs in our region. This  
17 hypothesis is not supported by annual nursing turnover data, which shows that less nurses  
18 voluntarily left their position in the PMCC (3.9%) than across all of University Health Network<sup>1</sup>  
19 (4.4%) or all 17 AHSCs in Ontario (6.5%) in the 2017/2018 fiscal year.<sup>2</sup> All of these rates appear  
20 lower than in the rest of Canada, where the mean nursing turnover rate is 19.9%,(5) and the  
21 US, where nursing turnover in hospitals with more than 500 beds was 18.6% in 2018.(13)  
22  
23  
24

25 This study has multiple limitations. Study participants were limited to nurses that practice in  
26 the area of cardiovascular medicine in two quaternary referral hospitals, which could limit the  
27 ability to generalize our results. Just under 50% of nurses responded to the survey, which could  
28 introduce response bias. The relatively modest number of respondents could limit study  
29 validity, makes type 2 statistical errors more likely, and decreases the potential for the  
30 multivariable logistic regression model to yield statistically significant results. Survey  
31 respondents in this study included nurses that practice in the area of cardiovascular medicine  
32 and surgery, which limits the ability to directly compare burnout and distress scores with nurses  
33 that practice in the United States that have completed the WBI survey, as the cohort of nurses  
34 from the United States included nurses that practice in all areas of nursing in an AHSC.  
35  
36  
37  
38

39 The perception of inadequate staffing levels or of being treated unfairly in the workplace  
40 correlates with burnout among nurses. Furthermore, dissatisfaction with the EHR, the  
41 perception of insufficient staffing levels or unfair treatment, and being on staff less than 16  
42 years were associated with high levels of distress among PMCC nurses. Our finding suggests  
43 that strategies to decrease burnout and distress among nurses should be directed at these  
44 institutional factors. Specific attention should be focused on nurses in the initial stages of their  
45 career, where the risk of burnout and distress are highest. The prevalence of distress scores  
46 above the threshold at which nurses are at risk for mental health issues and for providing  
47 suboptimal patient care emphasizes the need to direct effort and resources towards  
48 intervention strategies that have been shown to decrease burnout among nurses.(19, 20) The  
49  
50  
51

---

52  
53 <sup>1</sup> Includes Toronto General Hospital, Toronto Western Hospital, Princess Margaret Hospital, Toronto Rehabilitation  
54 Institute.

55 <sup>2</sup> Data from the Ontario Hospital Association.  
56  
57

1  
2  
3 level of burnout and distress identified in this study can be used as a baseline to evaluate the  
4 efficacy of interventions that are designed to decrease burnout and distress among nurses in  
5 the PMCC.  
6  
7

8 Affiliations: Division of Vascular Surgery, Peter Munk Cardiac Centre (Rubin) and Office of  
9 Professional Practice & Policy (Graham), Toronto General Hospital, University Health  
10 Network; Goldfarb Intelligence Marketing (Goldfarb); Mayo Foundation for Medical Education  
11 and Research, Division of Biomedical Statistics and Informatics (Satele).  
12  
13

14 Contributors: Barry Rubin, Rebecca Goldfarb and Leanna Graham designed the study. Barry  
15 Rubin drafted the manuscript. Daniel Satele carried out the statistical analysis. All authors  
16 analyzed and interpreted the data, contributed to the study conception, critically revised the  
17 manuscript for important intellectual content, approved the version to be published and agreed  
18 to be accountable for all aspects of the work.  
19  
20

21 Funding: This work was supported by a grant from the Peter Munk Cardiac Centre Innovation  
22 Fund.  
23  
24

25 Acknowledgements: The authors thanks Liselotte Dyrbye, Professor of Medical Education and  
26 Professor of Medicine, Division of Community Internal Medicine, Department of Internal  
27 Medicine, Mayo Clinic and Danielle Martin, EVP & Chief Medical Executive, Women's College  
28 Hospital for very helpful discussions.  
29  
30

31 Disclaimer: The funding group had no role in the design, conduct or implementation of the  
32 study or manuscript. The authors have no conflict of interest to declare.  
33  
34  
35  
36  
37  
38  
39  
40  
41  
42  
43  
44  
45  
46  
47  
48  
49  
50  
51  
52  
53  
54  
55  
56  
57  
58  
59  
60

1  
2  
3  
4  
5  
6  
7  
8  
9  
10  
11  
12  
13  
14  
15  
16  
17  
18  
19  
20  
21  
22  
23  
24  
25  
26  
27  
28  
29  
30  
31  
32  
33  
34  
35  
36  
37  
38  
39  
40  
41  
42  
43  
44  
45  
46  
47  
48  
49  
50  
51  
52  
53  
54  
55  
56  
57  
58  
59  
60

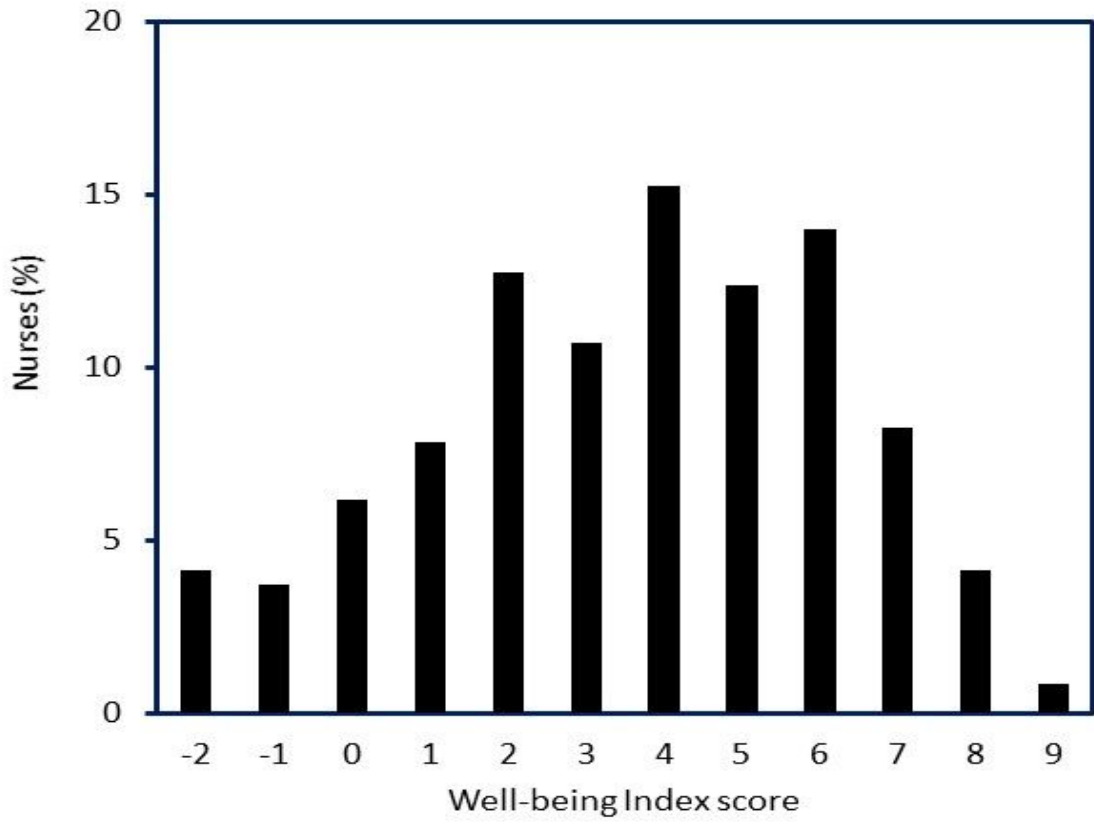

Figure 1. Distribution of well-being Index scores among 242 nurses in the PMCC.



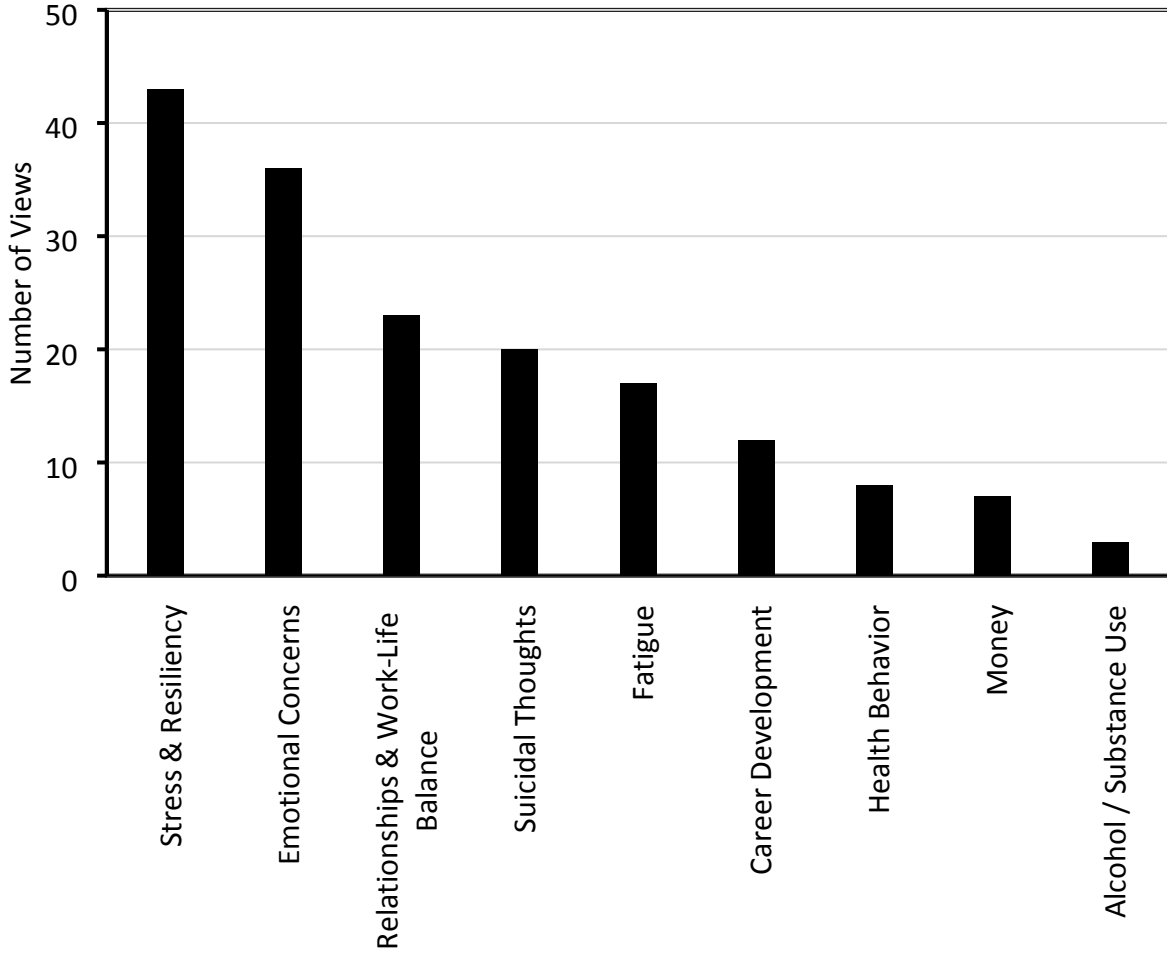

Figure 2. Access to online resources by PMCC 242 nurses. Number of views, by category.

## References

1. Maslach C JS, Leiter MP. Maslach Burnout Inventory Manual, 3rd ed. Palo Alto, CA: Consulting Psychologists Press; 1996.
2. Dzau VJ, Kirch DG, Nasca TJ. To Care Is Human - Collectively Confronting the Clinician-Burnout Crisis. *N Engl J Med*. 2018;378(4):312-4.
3. Darban F, Balouchi A, Narouipour A, Safarzaei E, Shahdadi H. Effect of Communication Skills Training on the Burnout of Nurses: A Cross-Sectional Study. *J Clin Diagn Res*. 2016;10(4):lc01-ic4.
4. Bakhamis L, Paul DP, 3rd, Smith H, Coustasse A. Still an Epidemic: The Burnout Syndrome in Hospital Registered Nurses. *Health Care Manag (Frederick)*. 2019;38(1):3-10.
5. O'Brien-Pallas L, Murphy GT, Shamian J, Li X, Hayes LJ. Impact and determinants of nurse turnover: a pan-Canadian study. *J Nurs Manag*. 2010;18(8):1073-86.
6. Dyrbye LN, West CP, Johnson PO, Cipriano PF, Beatty DE, Peterson C, et al. Burnout and Satisfaction With Work-Life Integration Among Nurses. *J Occup Environ Med*. 2019;61(8):689-98.
7. Maslach C, Schaufeli WB, Leiter MP. Job burnout. *Annu Rev Psychol*. 2001;52:397-422.
8. Dyrbye LN, Satele D, Shanafelt T. Ability of a 9-Item Well-Being Index to Identify Distress and Stratify Quality of Life in US Workers. *J Occup Environ Med*. 2016;58(8):810-7.
9. Dyrbye LN, Johnson PO, Johnson LM, Satele DV, Shanafelt TD. Efficacy of the Well-Being Index to Identify Distress and Well-Being in U.S. Nurses. *Nurs Res*. 2018;67(6):447-55.
10. Rubin B. GR, Martin D and Graham L. Burnout and Distress among Physicians in the Peter Munk Cardiac Centre. Submitted for publication. 2020.
11. French CE, Ferlie E, Fulop NJ. The international spread of Academic Health Science Centres: a scoping review and the case of policy transfer to England. *Health Policy*. 2014;117(3):382-91.
12. Spence Laschinger HK, Wong C, Read E, Cummings G, Leiter M, Macphee M, et al. Predictors of new graduate nurses' health over the first 4 years of practice. *Nurs Open*. 2019;6(2):245-59.
13. B. C. 2019 NSI National Health Care Retention & RN Staffing Report. East Petersburg, PA NSI Nursing Solutions, Inc.
14. Dyrbye LN, Shanafelt, T. D., Sinsky, C. A., Cipriano, P. F., Bhatt, J.,, Ommaya A, Meyers, D. Burnout among health care professionals: A call to explore and address this underrecognized threat to safe, high-quality care. NAM Perspectives Discussion Paper, National Academy of Medicine. Washington, D.C. 2017.
15. McHugh MD, Kutney-Lee A, Cimiotti JP, Sloane DM, Aiken LH. Nurses' widespread job dissatisfaction, burnout, and frustration with health benefits signal problems for patient care. *Health Aff (Millwood)*. 2011;30(2):202-10.

16. Cimiotti JP, Aiken LH, Sloane DM, Wu ES. Nurse staffing, burnout, and health care-associated infection. *Am J Infect Control*. 2012;40(6):486-90.
17. Martin D, Miller AP, Quesnel-Vallee A, Caron NR, Vissandjee B, Marchildon GP. Canada's universal health-care system: achieving its potential. *Lancet*. 2018;391(10131):1718-35.
18. OECD, Occupancy rate of curative (acute) care beds, 2000 and 2015 (or nearest year). Paris 2017 [https://doi.org/10.1787/health\\_glance-2017-graph158-en](https://doi.org/10.1787/health_glance-2017-graph158-en). OECD Publishing, Health care activities 2017.
19. Barrientos-Trigo S, Vega-Vazquez L, De Diego-Cordero R, Badanta-Romero B, Porcel-Galvez AM. Interventions to improve working conditions of nursing staff in acute care hospitals: Scoping review. *J Nurs Manag*. 2018;26(2):94-107.
20. de Oliveira SM, de Alcantara Sousa LV, Vieira Gadelha MDS, do Nascimento VB. Prevention Actions of Burnout Syndrome in Nurses: An Integrating Literature Review. *Clin Pract Epidemiol Ment Health*. 2019;15:64-73.

Confidential

1  
2  
3 **Appendix 1.** Poster describing the WBI survey.  
4  
5  
6  
7

8  **Well-Being Index**  
9  
10  
11  
12

13 Why?  
14

- 15  To assess the well-being of clinicians (nurses, allied health,  
16 pharmacists, physicians) at the PMCC.  
17  
18  
19

20 What?  
21

- 22  The Well-Being Index is a web-based tool that evaluates multiple  
23 dimensions of your well-being.  
24  
25  You will receive your own individual results. Your responses and  
26 your dashboard of results are **completely anonymous and**  
27 **confidential.**  
28  
29  
30  
31  PMCC will only receive aggregate anonymous data. This data will  
32 help us focus on caring for our caregivers.  
33  
34  
35  
36  
37

38 When?  
39

- 40  You will receive an email invitation from Canadian Viewpoint with  
41 the subject line “Invitation to use the Well-Being Index”.  
42  
43  The email invitation will have information and instructions that  
44 explain how to complete the Well-Being Index.  
45  
46

47 Thank you for participating in this important survey.  
48  
49

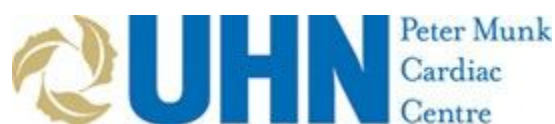

**Appendix 2.** E-mail invitation to participate in the Well-Being Index survey.

**Email Subject line:** [Well-Being Index Survey](#)

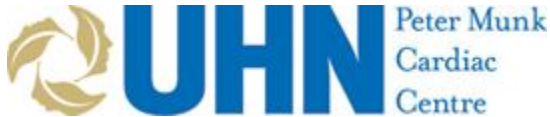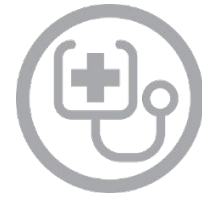

**Your well-being is vital to patients' outcomes. Assess your well-being and compare your results.**

We are sending this note as an invitation to participate in our very important survey on nurse well-being. We are undertaking this survey because we are committed to supporting the well-being of all our clinicians.

**Setting up an account is easy and completing the index takes just a few minutes.**

Assess Your Well-Being Online:

<https://www.mywellbeingindex.org/signup>

Invitation Code: **UHN NURSE**

Download the Well-Being Index Mobile App

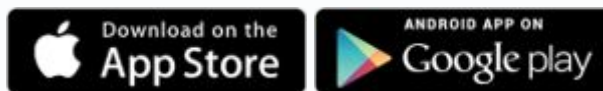

**What is the Well-Being Index?**

The Well-Being Index is a **100 percent anonymous**, web-based tool that evaluates multiple dimensions of your well-being. This tool allows users to compare their scores to clinicians at other hospitals, and to track their own well-being over time. After completing the on-line survey, which takes about 3 minutes, you will immediately receive your **confidential** results in the form of a dashboard. The survey also provides important contact information and resources, should you require further assistance. PMCC will receive aggregate, anonymous data that will help us focus on caring for our caregivers, including developing new ways to improve clinician well-being and decrease clinician burnout.

**Confidentiality of Results**

It is important to emphasize that your individual responses and your dashboard of results are **completely anonymous and confidential**. It will not be possible for the PMCC, UHN or Canadian Viewpoint, the independent company that is sending you this link to complete the Well-Being

1  
2  
3  
4  
5  
6  
7  
8  
9  
10  
11  
12  
13  
14  
15  
16  
17  
18  
19  
20  
21  
22  
23  
24  
25  
26  
27  
28  
29  
30  
31  
32  
33  
34  
35  
36  
37  
38  
39  
40  
41  
42  
43  
44  
45  
46  
47  
48  
49  
50  
51  
52  
53  
54  
55  
56  
57  
58  
59  
60

Index survey, to see or obtain this information. UHN Human Resources and the UHN Digital and Privacy Office have vetted and approved this approach to ensure that your results remain private.

Confidential

| Gender         | n (%)     | Years since graduation from nursing school |           | Years working at UHN |          | Employment status    | n (%)     | Work Area                 | n (%)     |
|----------------|-----------|--------------------------------------------|-----------|----------------------|----------|----------------------|-----------|---------------------------|-----------|
|                |           | < 2                                        | 2 - 5     | 6 - 10               | 11 - 15  |                      |           |                           |           |
| Male           | 31 (13%)  | < 2                                        | 14 (6%)   | < 2                  | 25 (10%) | Full-time, permanent | 197 (81%) | Out-patient Clinic        | 13 (5%)   |
| Female         | 206 (87%) | 2 - 5                                      | 32 (13%)  | 2 - 5                | 47 (19%) | Part-time, permanent | 36 (15%)  | In-patient Ward           | 101 (42%) |
| Gender Diverse | 1 (0.4%)  | 6 - 10                                     | 39 (16%)  | 6 - 10               | 28 (12%) | Casual, temp, other  | 9 (4%)    | Critical Care             | 100 (41%) |
| Missing        | 4         | 11 - 15                                    | 34 (14%)  | 11 - 15              | 49 (20%) |                      |           | Cath lab or Int Radiology | 19 (8%)   |
|                |           | > 15                                       | 123 (51%) | > 15                 | 93 (38%) |                      |           | Other                     | 9 (4%)    |

Table 2. Response to individual WBI survey questions

|                                                         | Have you felt burned out from your work |           |         | Have you worried that work is hardening you emotionally |            |         | Have you often felt bothered by feeling down, depressed, or hopeless |            |         | Have you fallen asleep while sitting inactive in a public place |            |         | Have you felt that things were piling up so high you could not overcome them |            |         | Have you been bothered by emotional problems |            |         | Has physical health interfered with ability to do daily work |            |         | Work I do is meaningful to me (categorized) |            |             | Work schedule leaves enough time for personal life (categorized) |             |            |            |         |
|---------------------------------------------------------|-----------------------------------------|-----------|---------|---------------------------------------------------------|------------|---------|----------------------------------------------------------------------|------------|---------|-----------------------------------------------------------------|------------|---------|------------------------------------------------------------------------------|------------|---------|----------------------------------------------|------------|---------|--------------------------------------------------------------|------------|---------|---------------------------------------------|------------|-------------|------------------------------------------------------------------|-------------|------------|------------|---------|
|                                                         | Yes (N=188)                             | No (N=54) | P-value | Yes (N=179)                                             | No (N=63)  | P-value | Yes (N=135)                                                          | No (N=107) | P-value | Yes (N=93)                                                      | No (N=149) | P-value | Yes (N=115)                                                                  | No (N=127) | P-value | Yes (N=191)                                  | No (N=51)  | P-value | Yes (N=108)                                                  | No (N=134) | P-value | 1-2 (N=3)                                   | 3-5 (N=67) | 6-7 (N=172) | P-value                                                          | 1-2 (N=110) | 3 (N=45)   | 4-5 (N=87) | P-value |
| <b>Gender, n (%)</b>                                    | 0.74                                    |           |         | 0.74                                                    |            |         | 0.46                                                                 |            |         | 0.37                                                            |            |         | 0.56                                                                         |            |         | 0.85                                         |            |         | 0.34                                                         |            |         | 0.40                                        |            |             | 0.36                                                             |             |            |            |         |
| Male                                                    | 23 (74%)                                | 8 (26%)   |         | 24 (77%)                                                | 7 (22%)    |         | 15 (48%)                                                             | 16 (52%)   |         | 15 (48%)                                                        | 16 (52%)   |         | 14 (45%)                                                                     | 17 (55%)   |         | 25 (81%)                                     | 6 (19%)    |         | 16 (52%)                                                     | 15 (48%)   |         | 1 (3%)                                      | 12 (39%)   | 18 (58%)    |                                                                  | 10 (32.3%)  | 8 (25.8%)  | 13 (42%)   |         |
| Female                                                  | 162 (79%)                               | 44 (21%)  |         | 151 (73%)                                               | 55 (26%)   |         | 117 (57%)                                                            | 89 (43%)   |         | 77 (37%)                                                        | 129 (63%)  |         | 98 (48%)                                                                     | 108 (52%)  |         | 162 (79%)                                    | 44 (21%)   |         | 88 (43%)                                                     | 118 (57%)  |         | 2 (1%)                                      | 53 (26%)   | 151 (73%)   |                                                                  | 97 (47.1%)  | 36 (17.5%) | 73 (35%)   |         |
| Gender Diverse                                          | 1 (100%)                                | 0 (0%)    |         | 1 (100%)                                                | 0 (0%)     |         | 1 (100%)                                                             | 0 (0%)     |         | 0 (0%)                                                          | 1 (100%)   |         | 1 (10%)                                                                      | 0 (0%)     |         | 1 (100%)                                     | 0 (0%)     |         | 1 (100%)                                                     | 0 (0%)     |         | 0 (0%)                                      | 0 (0%)     | 1 (100%)    |                                                                  | 0 (0.0%)    | 0 (0.0%)   | 1 (100%)   |         |
| Missing                                                 | 2                                       | 2         |         | 3                                                       | 1          |         | 2                                                                    | 2          |         | 1                                                               | 3          |         | 2                                                                            | 2          |         | 3                                            | 1          |         | 3                                                            | 1          |         | 0                                           | 2          | 2           |                                                                  | 3           | 1          | 0          |         |
| <b>When did you graduate from nursing school, n (%)</b> | 0.25                                    |           |         | 0.45                                                    |            |         | 0.40                                                                 |            |         | 0.011                                                           |            |         | 0.41                                                                         |            |         | 0.16                                         |            |         | 0.89                                                         |            |         | 0.45                                        |            |             | 0.82                                                             |             |            |            |         |
| <2 years                                                | 9 (64%)                                 | 5 (36%)   |         | 10 (71%)                                                | 4 (29%)    |         | 11 (79%)                                                             | 3 (21%)    |         | 10 (71%)                                                        | 4 (29%)    |         | 7 (50%)                                                                      | 7 (50%)    |         | 14 (100%)                                    | 0 (0%)     |         | 6 (43%)                                                      | 8 (57%)    |         | 0 (0%)                                      | 3 (21%)    | 11 (79%)    |                                                                  | 9 (64%)     | 2 (14%)    | 3 (21%)    |         |
| 2-5 years                                               | 28 (88%)                                | 4 (13%)   |         | 25 (78%)                                                | 7 (22%)    |         | 17 (53%)                                                             | 15 (47%)   |         | 17 (53%)                                                        | 15 (47%)   |         | 16 (50%)                                                                     | 16 (50%)   |         | 25 (78%)                                     | 7 (22%)    |         | 16 (50%)                                                     | 16 (50%)   |         | 1 (3%)                                      | 11 (34%)   | 20 (63%)    |                                                                  | 17 (53%)    | 6 (19%)    | 9 (28%)    |         |
| 6-10 years                                              | 31 (80%)                                | 8 (21%)   |         | 32 (82%)                                                | 7 (18%)    |         | 23 (59%)                                                             | 16 (41%)   |         | 15 (39%)                                                        | 24 (61%)   |         | 14 (36%)                                                                     | 25 (64%)   |         | 33 (85%)                                     | 6 (15%)    |         | 16 (41%)                                                     | 23 (59%)   |         | 1 (3%)                                      | 14 (36%)   | 24 (62%)    |                                                                  | 18 (46%)    | 7 (18%)    | 14 (36%)   |         |
| 11-15 years                                             | 29 (85%)                                | 5 (15%)   |         | 27 (79%)                                                | 7 (21%)    |         | 20 (59%)                                                             | 14 (41%)   |         | 14 (41%)                                                        | 20 (59%)   |         | 20 (59%)                                                                     | 14 (41%)   |         | 28 (82%)                                     | 6 (18%)    |         | 17 (50%)                                                     | 17 (50%)   |         | 0 (0%)                                      | 12 (35%)   | 22 (65%)    |                                                                  | 13 (38%)    | 8 (24%)    | 13 (38%)   |         |
| 16+ years                                               | 91 (74%)                                | 32 (26%)  |         | 85 (69%)                                                | 38 (30.9%) |         | 64 (52%)                                                             | 59 (48%)   |         | 37 (30%)                                                        | 86 (70%)   |         | 58 (47%)                                                                     | 65 (53%)   |         | 91 (74%)                                     | 32 (26%)   |         | 53 (43%)                                                     | 70 (57%)   |         | 1 (1%)                                      | 27 (22%)   | 95 (77%)    |                                                                  | 53 (43%)    | 22 (18%)   | 48 (39%)   |         |
| <b>When did you begin working at UHN, n (%)</b>         | 0.38                                    |           |         | 0.83                                                    |            |         | 0.92                                                                 |            |         | 0.061                                                           |            |         | 0.85                                                                         |            |         | 0.59                                         |            |         | 0.51                                                         |            |         | 0.28                                        |            |             | 0.84                                                             |             |            |            |         |
| <2 years                                                | 17 (68%)                                | 8 (32%)   |         | 18 (72%)                                                | 7 (28%)    |         | 15 (60%)                                                             | 10 (40%)   |         | 16 (64%)                                                        | 9 (36%)    |         | 12 (48%)                                                                     | 13 (52%)   |         | 22 (88%)                                     | 3 (12%)    |         | 12 (48%)                                                     | 13 (52%)   |         | 0 (0%)                                      | 7 (28%)    | 18 (72%)    |                                                                  | 13 (52%)    | 4 (16%)    | 8 (32%)    |         |
| 2-5 years                                               | 38 (81%)                                | 9 (19%)   |         | 37 (79%)                                                | 10 (21%)   |         | 28 (60%)                                                             | 19 (40%)   |         | 20 (43%)                                                        | 27 (57%)   |         | 20 (43%)                                                                     | 27 (57%)   |         | 37 (79%)                                     | 10 (21%)   |         | 23 (49%)                                                     | 24 (51%)   |         | 2 (4%)                                      | 15 (32%)   | 30 (64%)    |                                                                  | 26 (55%)    | 7 (15%)    | 14 (30%)   |         |
| 6-10 years                                              | 20 (71%)                                | 8 (29%)   |         | 20 (71%)                                                | 8 (29%)    |         | 15 (54%)                                                             | 13 (46%)   |         | 9 (32%)                                                         | 19 (68%)   |         | 12 (43%)                                                                     | 16 (57%)   |         | 24 (86%)                                     | 4 (14%)    |         | 9 (32%)                                                      | 19 (68%)   |         | 0 (0%)                                      | 11 (39%)   | 17 (61%)    |                                                                  | 13 (46%)    | 6 (21%)    | 9 (32%)    |         |
| 11-15 years                                             | 42 (86%)                                | 7 (14%)   |         | 38 (78%)                                                | 11 (22%)   |         | 25 (51%)                                                             | 24 (49%)   |         | 17 (35%)                                                        | 32 (65%)   |         | 26 (53%)                                                                     | 23 (47%)   |         | 38 (78%)                                     | 11 (22%)   |         | 25 (51%)                                                     | 24 (49%)   |         | 0 (0%)                                      | 15 (31%)   | 34 (69%)    |                                                                  | 19 (39%)    | 11 (22%)   | 19 (39%)   |         |
| 16+ years                                               | 71 (76%)                                | 22 (24%)  |         | 66 (71%)                                                | 27 (29%)   |         | 52 (60%)                                                             | 41 (44%)   |         | 31 (33%)                                                        | 62 (67%)   |         | 45 (48%)                                                                     | 48 (52%)   |         | 70 (75%)                                     | 23 (25%)   |         | 39 (42%)                                                     | 54 (58%)   |         | 1 (1%)                                      | 19 (20%)   | 73 (79%)    |                                                                  | 39 (42%)    | 17 (18%)   | 37 (40%)   |         |
| <b>Employment status at UNH, n (%)</b>                  | 0.47                                    |           |         | 0.55                                                    |            |         | 0.052                                                                |            |         | 0.60                                                            |            |         | 0.46                                                                         |            |         | 0.64                                         |            |         | 0.80                                                         |            |         | 0.94                                        |            |             | 0.81                                                             |             |            |            |         |
| Full-time permanent                                     | 156 (79%)                               | 41 (21%)  |         | 148 (75%)                                               | 49 (25%)   |         | 111 (56%)                                                            | 86 (44%)   |         | 77 (39%)                                                        | 120 (61%)  |         | 91 (46%)                                                                     | 106 (54%)  |         | 156 (79%)                                    | 41 (20.8%) |         | 87 (44%)                                                     | 110 (56%)  |         | 3 (2%)                                      | 54 (27%)   | 140 (71%)   |                                                                  | 91 (46%)    | 36 (18%)   | 70 (36%)   |         |
| Part-time permanent                                     | 26 (72%)                                | 10 (28%)  |         | 24 (67%)                                                | 12 (33%)   |         | 16 (44%)                                                             | 20 (56%)   |         | 14 (39%)                                                        | 22 (61%)   |         | 18 (50%)                                                                     | 18 (50%)   |         | 27 (75%)                                     | 9 (25.0%)  |         | 16 (44%)                                                     | 20 (56%)   |         | 0 (0.0%)                                    | 10 (28%)   | 26 (72%)    |                                                                  | 16 (44%)    | 6 (17%)    | 14 (39%)   |         |
| Casual, temp, other                                     | 6 (67%)                                 | 3 (33%)   |         | 7 (78%)                                                 | 2 (22%)    |         | 8 (89%)                                                              | 1 (11%)    |         | 2 (22%)                                                         | 7 (78%)    |         | 6 (67%)                                                                      | 3 (33%)    |         | 8 (89%)                                      | 1 (11.1%)  |         | 5 (56%)                                                      | 4 (44%)    |         | 0 (0.0%)                                    | 3 (33%)    | 6 (67%)     |                                                                  | 3 (33%)     | 3 (33%)    | 3 (33%)    |         |
| Missing                                                 | 0                                       | 0         |         | 0                                                       | 0          |         | 0                                                                    | 0          |         | 0                                                               | 0          |         | 0                                                                            | 0          |         | 0                                            | 0          |         | 0                                                            | 0          |         | 0                                           | 0          | 0           |                                                                  | 0           | 0          | 0          |         |
| <b>Work Area, n (%)</b>                                 | 0.08                                    |           |         | 0.06                                                    |            |         | 0.51                                                                 |            |         | 0.51                                                            |            |         | 0.49                                                                         |            |         | 0.62                                         |            |         | 0.087                                                        |            |         | 0.95                                        |            |             | 0.063                                                            |             |            |            |         |
| Out-patient Clinic                                      | 10 (77%)                                | 3 (23%)   |         | 6 (46%)                                                 | 7 (54%)    |         | 6 (46%)                                                              | 7 (54%)    |         | 6 (46%)                                                         | 7 (54%)    |         | 6 (46%)                                                                      | 7 (54%)    |         | 9 (69%)                                      | 4 (31%)    |         | 3 (23%)                                                      | 10 (77%)   |         | 0 (0%)                                      | 3 (23%)    | 10 (77%)    |                                                                  | 5 (39%)     | 2 (15%)    | 6 (46%)    |         |
| In-patient Ward                                         | 86 (85%)                                | 15 (15%)  |         | 79 (78%)                                                | 22 (22%)   |         | 61 (60%)                                                             | 40 (40%)   |         | 42 (42%)                                                        | 59 (58%)   |         | 53 (52%)                                                                     | 48 (48%)   |         | 83 (82%)                                     | 18 (18%)   |         | 48 (48%)                                                     | 53 (52%)   |         | 2 (2%)                                      | 28 (28%)   | 71 (70%)    |                                                                  | 56 (55%)    | 11 (11%)   | 34 (34%)   |         |
| Critical Care (CVICU, CICU)                             | 74 (74%)                                | 26 (26%)  |         | 76 (76%)                                                | 24 (24%)   |         | 56 (56%)                                                             | 44 (44%)   |         | 38 (38%)                                                        | 62 (62%)   |         | 45 (45%)                                                                     | 55 (55%)   |         | 79 (79%)                                     | 21 (21%)   |         | 49 (49%)                                                     | 51 (51%)   |         | 1 (1%)                                      | 29 (29%)   | 70 (70%)    |                                                                  | 36 (36%)    | 28 (28%)   | 36 (36%)   |         |
| Cath lab or Int Radiology                               | 11 (58%)                                | 8 (42%)   |         | 11 (58%)                                                | 8 (42%)    |         | 8 (42%)                                                              | 11 (58%)   |         | 4 (21%)                                                         | 15 (79%)   |         | 6 (32%)                                                                      | 13 (68%)   |         | 13 (68%)                                     | 6 (32%)    |         | 7 (37%)                                                      | 12 (63%)   |         | 0 (0%)                                      | 6 (32%)    | 13 (68%)    |                                                                  | 10 (53%)    | 3 (16%)    | 6 (32%)    |         |
| Other                                                   | 7 (78%)                                 | 2 (22%)   |         | 7 (78%)                                                 | 2 (22%)    |         | 4 (44%)                                                              | 5 (55%)    |         | 3 (33%)                                                         | 6 (67%)    |         | 5 (56%)                                                                      | 4 (44%)    |         | 7 (78%)                                      | 2 (22%)    |         | 1 (11%)                                                      | 8 (89%)    |         | 0 (0%)                                      | 1 (11%)    | 8 (89%)     |                                                                  | 3 (33%)     | 1 (11%)    | 5 (57%)    |         |
| Missing                                                 | 0                                       | 0         |         | 0                                                       | 0          |         | 0                                                                    | 0          |         | 0                                                               | 0          |         | 0                                                                            | 0          |         | 0                                            | 0          |         | 0                                                            | 0          |         | 0                                           | 0          | 0           |                                                                  | 0           | 0          | 0          |         |
| <b>Rate satisfaction with EMR, n (%)</b>                | 0.16                                    |           |         | 0.20                                                    |            |         | 0.11                                                                 |            |         | 0.56                                                            |            |         | 0.055                                                                        |            |         | 0.012                                        |            |         | 0.23                                                         |            |         | 0.32                                        |            |             | 0.0087                                                           |             |            |            |         |
| Very unsatisfied                                        | 29 (83%)                                | 6 (17%)   |         | 28 (80%)                                                | 7 (20%)    |         | 25 (71%)                                                             | 10 (29%)   |         | 16 (46%)                                                        | 19 (54%)   |         | 22 (63%)                                                                     | 13 (37%)   |         | 33 (94%)                                     | 2 (6%)     |         | 21 (60%)                                                     | 14 (40%)   |         | 1 (3%)                                      | 15 (43%)   | 19 (54%)    |                                                                  | 25 (71%)    | 3 (9%)     | 7 (20%)    |         |
| Somewhat unsatisfied                                    | 41 (77%)                                | 12 (23%)  |         | 44 (83%)                                                | 9 (17%)    |         | 29 (55%)                                                             | 24 (45%)   |         | 20 (38%)                                                        | 33 (62%)   |         | 30 (57%)                                                                     | 23 (43%)   |         | 42 (79%)                                     | 11 (21%)   |         | 26 (49%)                                                     | 27 (51%)   |         | 1 (2%)                                      | 11 (21%)   | 41 (77%)    |                                                                  | 24 (45%)    | 10 (19%)   | 19 (36%)   |         |
| Neutral                                                 | 36 (86%)                                | 6 (14%)   |         | 29 (69%)                                                | 13 (31%)   |         | 23 (55%)                                                             | 19 (45%)   |         | 14 (33%)                                                        | 28 (67%)   |         | 14 (33%)                                                                     | 28 (67%)   |         | 36 (86%)                                     | 6 (14%)    |         | 19 (45%)                                                     | 23 (55%)   |         | 0 (0%)                                      | 12 (29%)   | 30 (71%)    |                                                                  | 17 (41%)    | 11 (26%)   | 14 (33%)   |         |
| Somewhat satisfied                                      | 58 (77%)                                | 17 (23%)  |         | 55 (73%)                                                | 20 (27%)   |         | 41 (55%)                                                             | 34 (45%)   |         | 32 (43%)                                                        | 43 (57%)   |         | 32 (43%)                                                                     | 43 (57%)   |         | 55 (73%)                                     | 20 (27%)   |         | 28 (37%)                                                     | 47 (63%)   |         | 1 (1%)                                      | 23 (31%)   | 51 (68%)    |                                                                  | 34 (45%)    | 12 (16%)   | 29 (39%)   |         |
| Very satisfied                                          | 15 (60%)                                | 10 (40%)  |         | 15 (60%)                                                | 10 (40%)   |         | 9 (36%)                                                              | 16 (64%)   |         | 7 (28%)                                                         | 18 (72%)   |         | 11 (44%)                                                                     | 14 (56%)   |         | 15 (60%)                                     | 10 (40%)   |         | 10 (40%)                                                     | 15 (60%)   |         | 0 (0%)                                      | 4 (16%)    | 21 (84%)    |                                                                  | 5 (20%)     | 4 (16%)    | 16 (64%)   |         |
| Missing                                                 | 9                                       | 3         |         | 8                                                       | 4          |         | 8                                                                    | 4          |         | 4                                                               | 8          |         | 6                                                                            | 6          |         | 10                                           | 2          |         | 4                                                            | 8          |         | 0                                           | 2          | 10          |                                                                  | 5           | 5          | 2          |         |



|    |                                                                                                            |           |          |           |          |           |          |          |           |          |          |           |          |          |           |        |          |           |          |          |          |
|----|------------------------------------------------------------------------------------------------------------|-----------|----------|-----------|----------|-----------|----------|----------|-----------|----------|----------|-----------|----------|----------|-----------|--------|----------|-----------|----------|----------|----------|
| 1  | <b>Somewhat / very satisfied with EHR (vs. neutral / unsatisfied), n(%)</b>                                |           | 0.12     |           | 0.19     |           | 0.16     |          | 0.93      |          | 0.24     |           | 0.0047   |          | 0.054     |        | 0.87     |           | 0.082    |          |          |
| 2  | Yes                                                                                                        | 73 (73%)  | 27 (27%) | 70 (70%)  | 30 (30%) | 50 (50%)  | 50 (50%) | 39 (39%) | 61 (61%)  | 43 (43%) | 57 (57%) | 70 (70%)  | 30 (30%) | 38 (38%) | 62 (62%)  | 1 (1%) | 27 (27%) | 72 (72%)  | 39 (39%) | 16 (16%) | 45 (45%) |
| 3  | No                                                                                                         | 106 (82%) | 24 (19%) | 101 (78%) | 29 (22%) | 77 (59%)  | 53 (40%) | 50 (39%) | 80 (61%)  | 66 (51%) | 64 (49%) | 111 (85%) | 19 (15%) | 66 (51%) | 64 (49%)  | 2 (2%) | 38 (29%) | 90 (69%)  | 66 (51%) | 24 (19%) | 40 (31%) |
| 4  | Missing                                                                                                    | 9         | 3        | 8         | 4        | 8         | 4        | 4        | 8         | 6        | 6        | 10        | 2        | 4        | 8         | 0      | 2        | 10        | 5        | 5        | 2        |
| 5  | <b>Staffing levels in this work setting are sufficient, n (%)</b>                                          |           | 0.0004   |           | 0.0097   |           | 0.017    |          | 0.14      |          | 0.0026   |           | 0.014    |          | 0.075     |        | 0.85     |           | <.0001   |          |          |
| 6  | Disagree strongly                                                                                          | 101 (89%) | 13 (11%) | 92 (81%)  | 22 (19%) | 75 (66%)  | 39 (34%) | 41 (36%) | 73 (64%)  | 68 (60%) | 46 (40%) | 97 (85%)  | 17 (15%) | 62 (54%) | 52 (46%)  | 3 (3%) | 34 (30%) | 77 (68%)  | 71 (62%) | 20 (18%) | 23 (20%) |
| 7  | Disagree somewhat                                                                                          | 44 (70%)  | 19 (30%) | 45 (71%)  | 18 (29%) | 30 (48%)  | 33 (52%) | 27 (43%) | 36 (57%)  | 21 (33%) | 42 (67%) | 47 (75%)  | 16 (25%) | 22 (35%) | 41 (65%)  | 0 (0%) | 18 (29%) | 45 (71%)  | 22 (35%) | 11 (18%) | 30 (48%) |
| 8  | Neutral                                                                                                    | 14 (82%)  | 3 (18%)  | 15 (88%)  | 2 (12%)  | 9 (53%)   | 8 (47%)  | 10 (59%) | 7 (41%)   | 9 (53%)  | 8 (47%)  | 15 (88%)  | 2 (12%)  | 7 (41%)  | 10 (59%)  | 0 (0%) | 5 (29%)  | 12 (71%)  | 3 (18%)  | 5 (29%)  | 9 (53%)  |
| 9  | Agree somewhat                                                                                             | 17 (55%)  | 14 (45%) | 16 (52%)  | 15 (48%) | 11 (36%)  | 20 (64%) | 11 (36%) | 20 (64%)  | 9 (29%)  | 22 (71%) | 20 (65%)  | 11 (35%) | 12 (39%) | 19 (61%)  | 0 (0%) | 7 (23%)  | 24 (77%)  | 7 (23%)  | 4 (13%)  | 20 (65%) |
| 10 | Agree strongly                                                                                             | 3 (60%)   | 2 (40%)  | 3 (60%)   | 2 (40%)  | 2 (40%)   | 3 (60%)  | 0 (0%)   | 5 (100%)  | 2 (40%)  | 3 (60%)  | 2 (40%)   | 3 (60%)  | 1 (20%)  | 4 (80%)   | 0 (0%) | 1 (20%)  | 4 (80%)   | 2 (40%)  | 0 (0%)   | 3 (60%)  |
| 11 | Missing                                                                                                    | 9         | 3        | 8         | 4        | 8         | 4        | 4        | 8         | 6        | 6        | 10        | 2        | 4        | 8         | 0      | 2        | 10        | 5        | 5        | 2        |
| 12 | <b>Somewhat/strongly agree staffing levels in work setting are adequate (vs. neutral / disagree), n(%)</b> |           | 0.0005   |           | 0.0013   |           | 0.012    |          | 0.27      |          | 0.028    |           | 0.0050   |          | 0.23      |        | 0.49     |           | 0.0013   |          |          |
| 13 | Yes                                                                                                        | 20 (56%)  | 16 (44%) | 19 (53%)  | 17 (47%) | 13 (36%)  | 23 (64%) | 11 (31%) | 25 (69%)  | 11 (31%) | 25 (69%) | 22 (61%)  | 14 (39%) | 13 (36%) | 23 (64%)  | 0 (0%) | 8 (22%)  | 28 (78%)  | 9 (25%)  | 4 (11%)  | 23 (64%) |
| 14 | No                                                                                                         | 159 (82%) | 35 (18%) | 152 (78%) | 42 (22%) | 114 (59%) | 80 (41%) | 78 (40%) | 116 (60%) | 98 (51%) | 96 (49%) | 159 (82%) | 35 (18%) | 91 (47%) | 103 (53%) | 3 (2%) | 57 (29%) | 134 (69%) | 96 (50%) | 36 (19%) | 62 (32%) |
| 15 | Missing                                                                                                    | 9         | 3        | 8         | 4        | 8         | 4        | 4        | 8         | 6        | 6        | 10        | 2        | 4        | 8         | 0      | 2        | 10        | 5        | 5        | 2        |
| 16 | <b>I am treated fairly in the workplace, n (%)</b>                                                         |           | 0.0004   |           | 0.0001   |           | <.0001   |          | 0.44      |          | 0.0003   |           | 0.0038   |          | 0.0004    |        | 0.40     |           | <.0001   |          |          |
| 17 | Disagree strongly                                                                                          | 38 (93%)  | 3 (7%)   | 36 (88%)  | 5 (12%)  | 32 (78%)  | 9 (22%)  | 14 (34%) | 27 (66%)  | 31 (76%) | 10 (24%) | 39 (95%)  | 2 (5%)   | 29 (71%) | 12 (29%)  | 1 (2%) | 15 (37%) | 25 (61%)  | 31 (76%) | 6 (15%)  | 4 (10%)  |
| 18 | Disagree somewhat                                                                                          | 35 (92%)  | 3 (8%)   | 35 (92%)  | 3 (8%)   | 27 (71%)  | 11 (29%) | 19 (50%) | 19 (50%)  | 20 (53%) | 18 (47%) | 31 (82%)  | 7 (18%)  | 17 (45%) | 21 (55%)  | 1 (3%) | 11 (30%) | 26 (68%)  | 17 (45%) | 5 (13%)  | 16 (42%) |
| 19 | Neutral                                                                                                    | 26 (79%)  | 7 (21%)  | 23 (70%)  | 10 (30%) | 15 (46%)  | 18 (54%) | 13 (39%) | 20 (61%)  | 16 (49%) | 17 (51%) | 27 (82%)  | 6 (18%)  | 12 (36%) | 21 (64%)  | 0 (0%) | 13 (39%) | 20 (60%)  | 14 (42%) | 8 (24%)  | 11 (33%) |
| 20 | Agree somewhat                                                                                             | 57 (73%)  | 21 (27%) | 57 (73%)  | 21 (27%) | 42 (54%)  | 36 (46%) | 31 (40%) | 47 (60%)  | 30 (39%) | 48 (61%) | 60 (77%)  | 18 (23%) | 37 (47%) | 41 (53%)  | 1 (1%) | 19 (24%) | 58 (74%)  | 36 (46%) | 15 (19%) | 27 (35%) |
| 21 | Agree strongly                                                                                             | 23 (58%)  | 17 (42%) | 20 (50%)  | 20 (50%) | 11 (28%)  | 29 (72%) | 12 (30%) | 28 (70%)  | 12 (30%) | 28 (70%) | 24 (60%)  | 16 (40%) | 9 (23%)  | 31 (77%)  | 0 (0%) | 7 (18%)  | 33 (82%)  | 7 (18%)  | 6 (15%)  | 27 (67%) |
| 22 | Missing                                                                                                    | 9         | 3        | 8         | 4        | 8         | 4        | 4        | 8         | 6        | 6        | 10        | 2        | 4        | 8         | 0      | 2        | 10        | 5        | 5        | 2        |
| 23 | <b>Somewhat / strongly agree I am treated fairly (vs. neutral / disagree), n (%)</b>                       |           | 0.0002   |           | 0.0012   |           | 0.0013   |          | 0.47      |          | 0.0002   |           | 0.0043   |          | 0.051     |        | 0.073    |           | 0.0082   |          |          |
| 24 | Yes                                                                                                        | 80 (68%)  | 38 (32%) | 77 (65%)  | 41 (35%) | 53 (45%)  | 65 (55%) | 43 (36%) | 75 (64%)  | 42 (36%) | 76 (64%) | 84 (71%)  | 34 (29%) | 46 (39%) | 72 (61%)  | 1 (1%) | 26 (22%) | 91 (77%)  | 43 (36%) | 21 (18%) | 54 (46%) |
| 25 | No                                                                                                         | 99 (89%)  | 13 (11%) | 94 (84%)  | 18 (16%) | 74 (66%)  | 38 (34%) | 46 (41%) | 66 (59%)  | 67 (60%) | 45 (40%) | 97 (87%)  | 15 (13%) | 58 (52%) | 54 (48%)  | 2 (2%) | 39 (35%) | 71 (63%)  | 62 (55%) | 19 (17%) | 31 (28%) |
| 26 | Missing                                                                                                    | 9         | 3        | 8         | 4        | 8         | 4        | 4        | 8         | 6        | 6        | 10        | 2        | 4        | 8         | 0      | 2        | 10        | 5        | 5        | 2        |

**Table 3. Predictors of high nurse WBI scores**

|                                                         | WBI Score $\geq 2$ , nurses |              | P-value |
|---------------------------------------------------------|-----------------------------|--------------|---------|
|                                                         | Yes<br>(N=189)              | No<br>(N=53) |         |
| <b>Gender, n (%)</b>                                    |                             |              | 0.87    |
| Male                                                    | 24 (77.4%)                  | 7 (22.6%)    |         |
| Female                                                  | 160 (77.7%)                 | 46 (22.3%)   |         |
| Gender Diverse                                          | 1 (100.0%)                  | 0 (0.0%)     |         |
| Missing                                                 | 4 (2.1%)                    | 0 (0.0%)     |         |
| <b>When did you graduate from nursing school, n (%)</b> |                             |              | 0.37    |
| <2 years                                                | 12 (85.7%)                  | 2 (14.3%)    |         |
| 2-5 years                                               | 28 (87.5%)                  | 4 (12.5%)    |         |
| 6-10 years                                              | 31 (79.5%)                  | 8 (20.5%)    |         |
| 11-15 years                                             | 28 (82.4%)                  | 6 (17.6%)    |         |
| 16+ years                                               | 90 (73.2%)                  | 33 (26.8%)   |         |
| <b>When did you begin working at UNH, n (%)</b>         |                             |              | 0.85    |
| <2 years                                                | 21 (84.0%)                  | 4 (16.0%)    |         |
| 2-5 years                                               | 35 (74.5%)                  | 12 (25.5%)   |         |
| 6-10 years                                              | 23 (82.1%)                  | 5 (17.9%)    |         |
| 11-15 years                                             | 39 (79.6%)                  | 10 (20.4%)   |         |
| 16+ years                                               | 71 (76.3%)                  | 22 (23.7%)   |         |
| <b>Employment status at UNH, n (%)</b>                  |                             |              | 0.67    |
| Full-time permanent                                     | 154 (78.2%)                 | 43 (21.8%)   |         |
| Part-time permanent                                     | 27 (75.0%)                  | 9 (25.0%)    |         |
| Casual, temp, other                                     | 8 (88.9%)                   | 1 (11.1%)    |         |
| <b>Work Area, n (%)</b>                                 |                             |              | 0.58    |
| Out-patient Clinic                                      | 9 (69.2%)                   | 4 (30.8%)    |         |
| In-patient Ward                                         | 84 (83.2%)                  | 17 (16.8%)   |         |
| Critical Care (CVICU, CICU)                             | 75 (75.0%)                  | 25 (25.0%)   |         |
| Cath lab or Int Radiology                               | 14 (73.7%)                  | 5 (26.3%)    |         |
| Other                                                   | 7 (77.8%)                   | 2 (22.2%)    |         |
| <b>Rate satisfaction with EMR, n (%)</b>                |                             |              | 0.0029  |
| Very unsatisfied                                        | 33 (94.3%)                  | 2 (5.7%)     |         |
| Somewhat unsatisfied                                    | 41 (77.4%)                  | 12 (22.6%)   |         |
| Neutral                                                 | 35 (83.3%)                  | 7 (16.7%)    |         |
| Somewhat satisfied                                      | 58 (77.3%)                  | 17 (22.7%)   |         |
| Very satisfied                                          | 13 (52.0%)                  | 12 (48.0%)   |         |
| Missing                                                 | 9 (4.8%)                    | 3 (1.5%)     |         |

**Table 3. Predictors of high nurse WBI scores**

|                                                                   | WBI Score $\geq 2$ , nurses |              | P-value |
|-------------------------------------------------------------------|-----------------------------|--------------|---------|
|                                                                   | Yes<br>(N=189)              | No<br>(N=53) |         |
| <b>Staffing levels in this work setting are sufficient, n (%)</b> |                             |              | <.0001  |
| Disagree strongly                                                 | 103 (90.4%)                 | 11 (9.6%)    |         |
| Disagree somewhat                                                 | 44 (69.8%)                  | 19 (30.2%)   |         |
| Neutral                                                           | 14 (82.4%)                  | 3 (17.6%)    |         |
| Agree somewhat                                                    | 16 (51.6%)                  | 15 (48.4%)   |         |
| Agree strongly                                                    | 3 (60.0%)                   | 2 (40.0%)    |         |
| Missing                                                           | 9 (4.8%)                    | 3 (1.5%)     |         |
| <b>I am treated fairly in the workplace, n (%)</b>                |                             |              | <.0001  |
| Disagree strongly                                                 | 37 (90.2%)                  | 4 (9.8%)     |         |
| Disagree somewhat                                                 | 35 (92.1%)                  | 3 (7.9%)     |         |
| Neutral                                                           | 25 (75.8%)                  | 8 (24.2%)    |         |
| Agree somewhat                                                    | 66 (84.6%)                  | 12 (15.4%)   |         |
| Agree strongly                                                    | 17 (42.5%)                  | 23 (57.5%)   |         |
| Missing                                                           | 9 (4.8%)                    | 3 (1.5%)     |         |

Confidential

1  
2  
3  
4  
5  
6  
7  
8  
9  
10  
11  
12  
13  
14  
15  
16  
17  
18  
19  
20  
21  
22  
23  
24  
25  
26  
27  
28  
29  
30  
31  
32  
33  
34  
35  
36  
37  
38  
39  
40  
41  
42  
43  
44  
45  
46

**Table 4. Multivariable model for factors associated with a WBI score for nurses ≥ 2**

| Effect (reference)                                  | Odds Ratio | 95% Wald Confidence Limits |      | P-value |
|-----------------------------------------------------|------------|----------------------------|------|---------|
| Male (vs. female)                                   | 1.17       | 0.42                       | 3.30 | 0.77    |
| 0-15 years since grad (vs. 16+)                     | 2.69       | 1.08                       | 6.71 | 0.035   |
| 0-5 years at UHN (vs. 6+)                           | 0.64       | 0.24                       | 1.66 | 0.35    |
| Non full-time, permanent (vs. full-time, permanent) | 0.87       | 0.35                       | 2.18 | 0.77    |
| Work area (vs. all others)                          |            |                            |      |         |
| In-patient Ward                                     | 0.89       | 0.31                       | 2.54 | 0.77    |
| Critical Care                                       | 0.50       | 0.19                       | 1.34 | 0.17    |
| Satisfied with EHR (vs. not)                        | 0.63       | 0.32                       | 1.27 | 0.20    |
| Treated fairly (vs. not)                            | 0.53       | 0.25                       | 1.13 | 0.10    |
| Staffing levels are adequate (vs. not)              | 0.27       | 0.12                       | 0.64 | 0.003   |

Confidential

**Table 5. Comparison of WBI scores between nurses in practice at the PMCC and at Academic Health Science Centres in the United States**

|                                                                                    | <b>PMCC Nurses<br/>(N=242)</b> | <b>US Nurses<br/>(N=3,627)</b> | <b>P-value</b> |
|------------------------------------------------------------------------------------|--------------------------------|--------------------------------|----------------|
| <b>Gender, n (%)</b>                                                               |                                |                                | 0.0043         |
| Male                                                                               | 31 (13.0%)                     | 281 (7.8%)                     |                |
| Female                                                                             | 206 (86.6%)                    | 3,340 (92.2%)                  |                |
| Gender Diverse                                                                     | 1 (0.4%)                       | 3 (0.1%)                       |                |
| Missing                                                                            | 4                              | 3                              |                |
| <b>Have you felt burned out from your work, n (%)</b>                              |                                |                                | <.0001         |
| Yes                                                                                | 188 (77.7%)                    | 2,196 (60.5%)                  |                |
| No                                                                                 | 54 (22.3%)                     | 1,431 (39.5%)                  |                |
| <b>Have you worried that work is hardening you emotionally, n (%)</b>              |                                |                                | <.0001         |
| Yes                                                                                | 179 (74.0%)                    | 1,689 (46.6%)                  |                |
| No                                                                                 | 63 (26.0%)                     | 1,938 (53.4%)                  |                |
| <b>Have you often felt bothered by feeling down, depressed, or hopeless, n (%)</b> |                                |                                | <.0001         |
| Yes                                                                                | 135 (55.8%)                    | 1,497 (41.3%)                  |                |
| No                                                                                 | 107 (44.2%)                    | 2,130 (58.7%)                  |                |
| <b>Have you fallen asleep while sitting inactive in a public place, n (%)</b>      |                                |                                | <.0001         |
| Yes                                                                                | 93 (38.4%)                     | 438 (12.1%)                    |                |
| No                                                                                 | 149 (61.6%)                    | 3,189 (87.9%)                  |                |

1  
2  
3  
4  
5  
6  
7  
8  
9  
10  
11  
12  
13  
14  
15  
16  
17  
18  
19  
20  
21  
22  
23  
24  
25  
26  
27  
28  
29  
30  
31  
32  
33  
34  
35  
36  
37  
38  
39  
40  
41  
42  
43  
44  
45  
46

|                                                                                            |             |               |        |
|--------------------------------------------------------------------------------------------|-------------|---------------|--------|
| <b>Have you felt that things were piling up so high you could not overcome them, n (%)</b> |             |               | 0.047  |
| Yes                                                                                        | 115 (47.5%) | 1,488 (41.0%) |        |
| No                                                                                         | 127 (52.5%) | 2,139 (59.0%) |        |
| <b>Have you been bothered by emotional problems, n (%)</b>                                 |             |               | <.0001 |
| Yes                                                                                        | 191 (78.9%) | 2,326 (64.1%) |        |
| No                                                                                         | 51 (21.1%)  | 1,301 (35.9%) |        |
| <b>Has physical health interfered with ability to do daily work, n (%)</b>                 |             |               | <.0001 |
| Yes                                                                                        | 108 (44.6%) | 894 (24.6%)   |        |
| No                                                                                         | 134 (55.4%) | 2,733 (75.4%) |        |
| <b>The work I do is meaningful to me (1-7, higher = better)</b>                            |             |               | 0.0672 |
| N                                                                                          | 242         | 3627          |        |
| Mean (SD)                                                                                  | 5.9 (1.14)  | 5.7 (1.31)    |        |
| Median                                                                                     | 6           | 6             |        |
| Range                                                                                      | 1.0, 7.0    | 1.0, 7.0      |        |
| <b>Work I do is meaningful to me (categorized), n (%)</b>                                  |             |               | 0.097  |
| 1-2                                                                                        | 3 (1.2%)    | 115 (3.2%)    |        |
| 3-5                                                                                        | 67 (27.7%)  | 1,130 (31.2%) |        |
| 6-7                                                                                        | 172 (71.1%) | 2,382 (65.7%) |        |

|    |                                                      |             |               |        |
|----|------------------------------------------------------|-------------|---------------|--------|
| 1  |                                                      |             |               |        |
| 2  |                                                      |             |               |        |
| 3  |                                                      |             |               |        |
| 4  |                                                      |             |               |        |
| 5  |                                                      |             |               |        |
| 6  | <b>Work schedule leaves enough</b>                   |             |               | <.0001 |
| 7  | <b>time for personal life (1-5,</b>                  |             |               |        |
| 8  | <b>higher = better)</b>                              |             |               |        |
| 9  | N                                                    | 242         | 3627          |        |
| 10 | Mean (SD)                                            | 2.9 (1.23)  | 3.3 (1.16)    |        |
| 11 | Median                                               | 3           | 3             |        |
| 12 | Range                                                | 1.0, 5.0    | 1.0, 5.0      |        |
| 13 |                                                      |             |               |        |
| 14 |                                                      |             |               |        |
| 15 |                                                      |             |               |        |
| 16 | <b>Work schedule leaves enough time for</b>          |             |               | <.0001 |
| 17 | <b>personal life (categorized), n (%)</b>            |             |               |        |
| 18 | 1-2                                                  | 110 (45.5%) | 1,055 (29.1%) |        |
| 19 | 3                                                    | 45 (18.6%)  | 908 (25.0%)   |        |
| 20 | 4-5                                                  | 87 (36.0%)  | 1,664 (45.9%) |        |
| 21 |                                                      |             |               |        |
| 22 |                                                      |             |               |        |
| 23 |                                                      |             |               |        |
| 24 | <b>WBI Score</b>                                     |             |               | <.0001 |
| 25 | N                                                    | 242         | 3,627         |        |
| 26 | Mean (SD)                                            | 3.6 (2.61)  | 2.1 (2.58)    |        |
| 27 | Median                                               | 4           | 2             |        |
| 28 | Range                                                | -2.0, 9.0   | -2.0, 9.0     |        |
| 29 |                                                      |             |               |        |
| 30 |                                                      |             |               |        |
| 31 | <b>High WBI Score (<math>\geq 2</math>), n(%)</b>    |             |               | <.0001 |
| 32 | Yes                                                  | 189 (78.1%) | 2,069 (57.0%) |        |
| 33 | No                                                   | 53 (21.9%)  | 1,558 (43.0%) |        |
| 34 |                                                      |             |               |        |
| 35 |                                                      |             |               |        |
| 36 | <b>Severe WBI Score (<math>\geq 4</math>), n (%)</b> |             |               | <.0001 |
| 37 | Yes                                                  | 132 (54.5%) | 1,160 (32.0%) |        |
| 38 | No                                                   | 110 (45.5%) | 2,467 (68.0%) |        |
| 39 |                                                      |             |               |        |
| 40 |                                                      |             |               |        |
| 41 |                                                      |             |               |        |
| 42 |                                                      |             |               |        |
| 43 |                                                      |             |               |        |
| 44 |                                                      |             |               |        |
| 45 |                                                      |             |               |        |
| 46 |                                                      |             |               |        |
